# Supplementary material
Source: publisher figshare collection journal article supplement (https://acs.figshare.com/ndownloader/files/10661104)
Supplement: Supplementary file 1 [file 10661104]

# **Supporting Information For Oedometric Small-Angle Neutron Scattering: *In Situ* Observation of Nano-Pore Structure During Bentonite Consolidation and Swelling in Dry and Hydrous CO<sub>2</sub> Environments**

Thomas A. Dewers, Jason E. Heath, Charles R. Bryan, Joseph T. Mang, Rex P. Hjelm, Mei

Ding, Mark Taylor

Number of pages: 69

Number of figures: 30 main figures labeled S1-S30, with several other figures embedded in a finite element analysis report

Number of tables: no main tables, with several tables embedded in a finite element analysis report

This Supporting Information contains: information on the design, construction, and finite element testing of components of both the Titanium oedometric cell (TOC) and the Oedometric SANS Cell (OSC); design elements of the OSC to minimize multiple scattering; information on interpretation of SANS results including sensitivity to parameter choices; and results of TOUGH2 simulations used to calculate water saturation in liquid CO<sub>2</sub> at experimental conditions.

## **Contents**

|                                                                                                        |    |
|--------------------------------------------------------------------------------------------------------|----|
| S1. Design, Construction, and Testing of Oedometric Cells Used in the Study                            | 3  |
| S1.1. Design and Materials of the Aluminum-window Oedometer.....                                       | 3  |
| S1.2. Finite Element Analysis of the OSC .....                                                         | 8  |
| S1.3. Design, Materials, and Finite Element Modeling of the Titanium Oedometer.....                    | 31 |
| S2. Neutron Beam Transmission as a Function of Sample Thickness, and Assessment of Multiple Scattering | 35 |
| S3. SANS Interpretation and Parameter Sensitivity. 38                                                  |    |
| S3.1. Stage I Dry Consolidation .....                                                                  | 38 |
| S3.2. Stage II Dry Consolidation .....                                                                 | 39 |
| S3.3. Stage III Hydrostatic Pressurization with Dry CO <sub>2</sub> .....                              | 46 |
| S3.4. Stage IV Post-Dry CO <sub>2</sub> Consolidation.....                                             | 46 |
| S3.5. Stage V Hydrostatic Pressurization with Wet CO <sub>2</sub> .....                                | 47 |
| S3.6. Stage VI Post-Wet CO <sub>2</sub> Consolidation .....                                            | 47 |
| S3.7. Sensitivity of Pore Size Distribution Interpretations to Scattering Contrast. ....               | 60 |
| S4. TOUGH2 Calculations of Water Saturation and Liquid CO <sub>2</sub> Density                         | 62 |
| References.....                                                                                        | 67 |



## **S1. Design, Construction, and Testing of Oedometric Cells Used in the Study**

### ***S1.1. Design and Materials of the Aluminum-window Oedometer***

The aluminum oedometer has a sample geometry such that it is optimized for the optics of small-angle neutron scattering methods (this includes aluminum windows or so-called “neutron windows” as shown in Figure 1). The oedometer was leak and overpressure tested at Sandia National Laboratories’ (SNL’s) Geomechanics Laboratory to determine the maximum allowable working pressure (MAWP) and the safety factor for this custom built oedometer. The oedometer contains a 0.050 to 0.100 in<sup>3</sup> sample chamber, depending on position of the compression piston. The sample chamber is for placement of clay or other geological samples under uniaxial strain with pore fluids. The oedometer design facilitates measurement of “swelling” pressure or sample compaction. The oedometer is composed of steel and aluminum. The aluminum portion for the sample chamber has suitable low neutron attenuation to allow for measurement of a sample’s neutron scattering properties to infer pore structure. Thus, in addition to swelling-pressure measurements, the oedometer is designed for use in neutron-beam studies. The sample thickness normal to the neutron beam is ~3.2 mm, which is large enough to permit measurements of consolidation but small enough to minimize effects of multiple neutron scattering. The piping system connected to the OSC is compatible with the piping system described in the main text that was developed for the TIOC described below, except that different pressure relief valves (PRFs) are needed that are set at a lower pressure. All o-rings are composed of ethylene propylene (EP) or ethylene propylene diene monomer (EPDM) and thus resistant to supercritical CO<sub>2</sub>. Precision Plastic Mesh is used at the top and bottom of the clay sample to serve as a porous frit. The oedometer design includes a narrow slot for the sample, with a narrow piston. The pressure applied by the hydraulic piston will result in approximately

7.74 times higher stress on the sample due to the reduction of surface area of the ram piston that contacts the sample.

Figure S1 presents a schematic of the oedometer with annotation regarding fluid inlets and/or outlets, sample location, and dimensions. Results of a leak and overpressure test, safety-related information, and a finite element analysis on this custom-built vessel follow below.

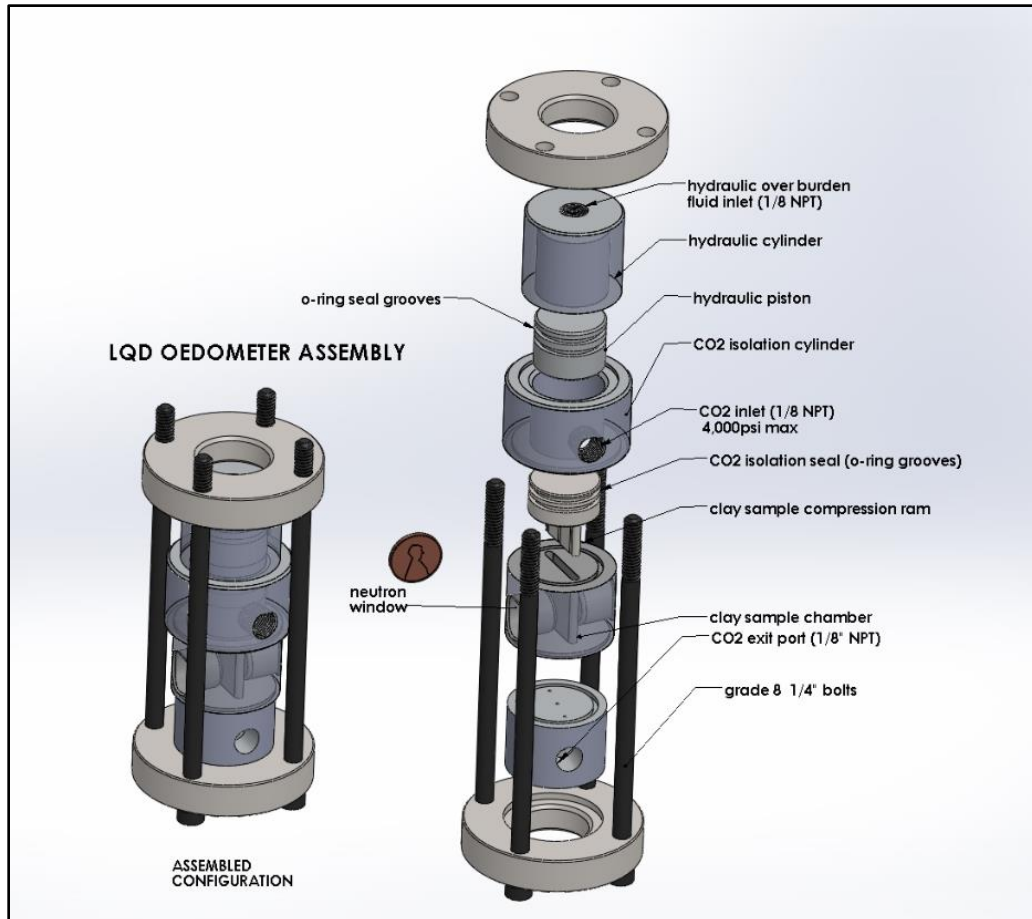

**Figure S1.** Schematic diagram of OSC with annotation indicated by arrows. Note penny for scale.

The AI-window oedometer required testing to determine the MAWP for the unique geometry and to verify no leaks. This testing used overpressure testing to determine the MAWP, the value to set the PRVs, and the factor of safety. For overpressure testing, strain gauges were placed at



five locations: two on the clay sample chamber at the location where the internal chamber comes closest to the outside wall; two at the base of the neutron window; and one above the CO<sub>2</sub> exit port (see Figure S2 for mounting locations).

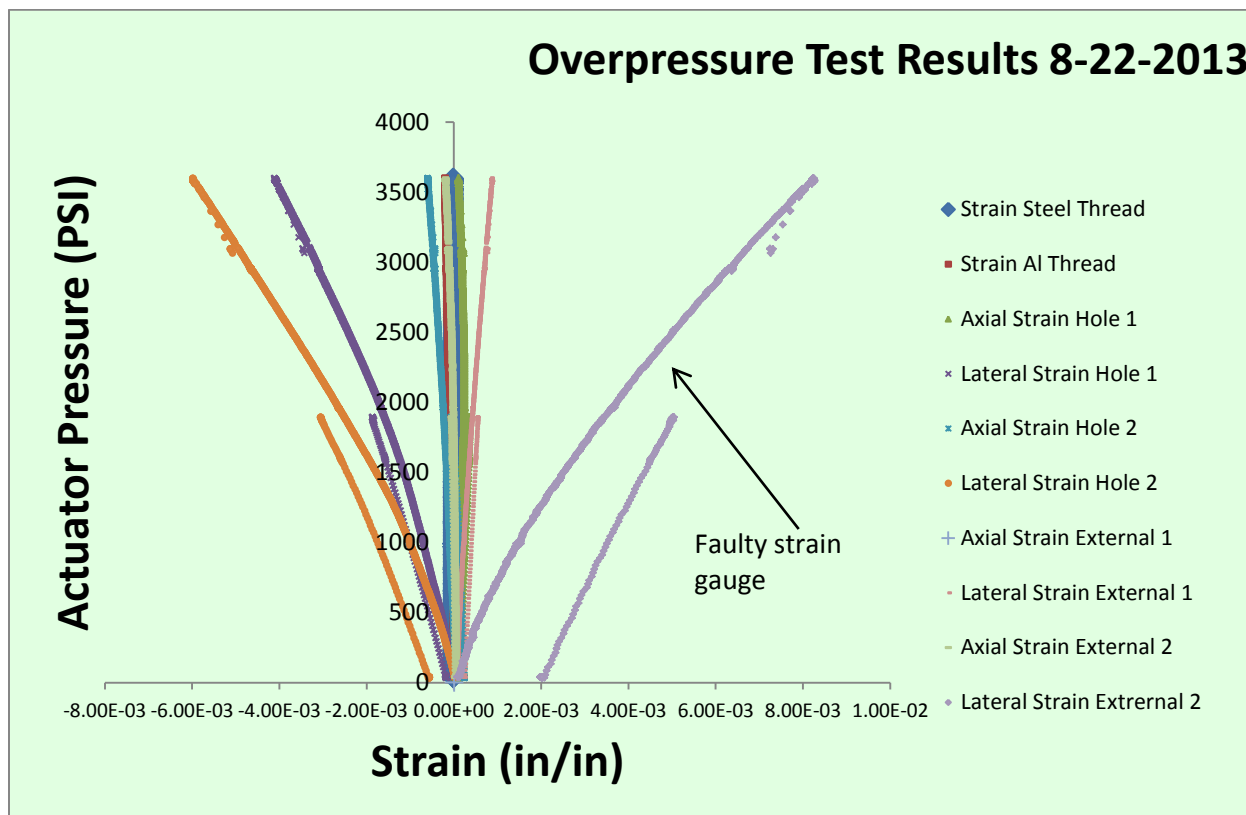

**Figure S3.** Results of pressure test to approximately 3673 psi.

During overpressure testing shown in Figure S3, fluid was placed in both the hydraulic cylinder and sample chamber. Pressure was increased inside the sample chamber. The test was performed with the vessel behind a Lexan barrier. The NPT fitting below the sample chamber leaked while pressure was applied, and thus it was retaped with Teflon and then did not leak. Pressure was increased to approximately 3598 psi and 3673 psi, respectively, for the hydraulic piston and within the sample chamber. Thus, the overpressure went to 1.22 (3673/3000) of 3,000 psi. The approximately highest pressure was held for approximately 10 minutes.

The overpressure test was meant to achieve approximately 3,900 psi based on an original intended MAWP of 3000 psi (based on initial FEA that used even higher internal pressure; see finite element analysis below). However, the maximum pressure achieved in the sample chamber was ~3673 psi. Pressure and strain gauge data are shown in Figure S3. Note that the “Lateral Strain External 2” was faulty and the data should be ignored. The sample chamber is made of 7075 T6 Aluminum. For this aluminum, the yield strain is ~0.7% (see Oskouei and Ibrahim, 2011). The orange curve “Lateral Strain Hole 2” shows a strain of -0.6% at 3,600 psi, which is the maximum observed strain. Extrapolating from the orange curve on Figure S3 to obtain the yield at 0.7% strain, we obtain a corresponding pressure of 4,000 psi. If we use a Factor of Safety of 4 and ignore any effects of geometry and also ignore any fatigue effects of the aluminum, that brings us to an operating pressure of  $4,000/4 = 1,000$  psi. Thus, the MAWP is set to 1,000 psi, with PRV. The operating pressure was determined to be from 0 to approximately 950 psi. The vessel showed no visible leakage when taken to the highest pressure.

This Al-window oedometer is to only be operated while it is behind Lexan shielding. Lexan shielding includes a tube around the oedometer, and a Lexan box around the entire system. Calculation on stored energy show that the oedometer itself has less stored energy than a basketball, for conditions at high pressure (3,000 psi); our tests are performed at a much lower MAWP. Pressure sources for the oedometer include fluid inlet and outlets to the sample chamber, and the fluid port for the upper hydraulic load cell (see Figure S2). As just discussed, the MAWP of the oedometer system is 1,000 psi. This MAWP is 2,000 psi lower than the original Ti oedometer (see the discussion on the Ti oedometer below). Thus, when using this Al-window oedometer, the PRVs must be set to 1,000 psi. The load cell is connected to a HiP pressure generator or ISCO pump, which is described in the piping system data package (not

given here). The operating pressure for the piping system to the sample chamber is from 0 –950 psi. The HiP pressure generator pressure, along with the sample swelling pressure, has a PRV also set to 1,000 psi. Thus, the PRV information here should be used for the piping system (in a different PSDP) when using this Al-steel oedometer.

### ***S1.2. Finite Element Analysis of the OSC***

The SolidWorks finite element analysis (FEA) report as prepared by co-author Mark Taylor is given in this section by component. This includes preliminary Factor-Of-Safety determinations by component shown in Figure 1, including the: A. hydraulic cylinder (ram); B. the pore pressure (CO<sub>2</sub>) isolation cylinders; and C. the sample (clay) chamber including the aluminum hydraulic windows.

#### **A. FE Simulation of Oedometer Hydraulic Cylinder Deformation**

Date: Tuesday, July 30, 2013

Designer: M.Taylor

Study name: hydraulic chamber for oedometer

Analysis type: Static

#### **Description**

This report contains detailed information from a finite element stress analysis performed on the hydraulic cylinder, a part of the Los Alamos designed oedometer from July of 2013. A Solidworks FEA stress analysis was performed using the Solidworks Simulation software. In this study, the model was subjected to a simulated 4,000 psi hydrostatic load on all pressure exposed surfaces.

#### **Conclusion**

The stated minimum factor of safety is reported at 5.3, though it is evident from the stress map and the FOS map, this stress level is only found at one spot on an internal surface that is blanketed by layers of lower stressed material. The functional minimum FOS is measured by the stresses on the external walls of the vessel that would have to rupture in order for a failure to occur. By that measure the minimum factor of safety appears to be >7.



### Model Information

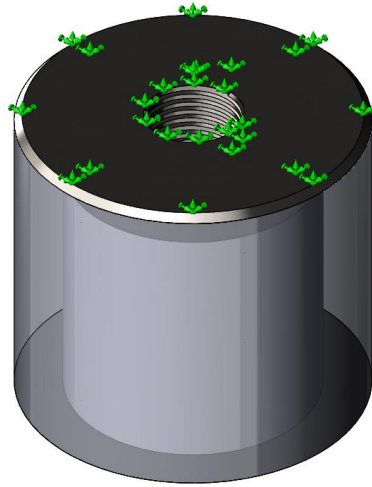

Model name: Oedometer Hydraulic Cylinder

Current Configuration: Default

#### Solid Bodies

| Document Name and Reference                                                                       | Treated As | Volumetric Properties                                                                                       | Document Path/Date Modified                                                                                           |
|---------------------------------------------------------------------------------------------------|------------|-------------------------------------------------------------------------------------------------------------|-----------------------------------------------------------------------------------------------------------------------|
| Cut-Sweep2<br>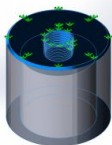 | Solid Body | Mass:0.136512 kg<br>Volume:1.7064e-005 m <sup>3</sup><br>Density:8000 kg/m <sup>3</sup><br>Weight:1.33781 N | C:\Users\149306\Desktop\Solidworks 2013\Oedometer Project\Oedometer Hydraulic Cylinder.SLDPRT<br>Jul 25 09:20:20 2013 |

#### Study Properties

|                                                                       |                                 |
|-----------------------------------------------------------------------|---------------------------------|
| <b>Study name</b>                                                     | hydraulic chamber for oedometer |
| <b>Analysis type</b>                                                  | Static                          |
| <b>Mesh type</b>                                                      | Solid Mesh                      |
| <b>Thermal Effect:</b>                                                | On                              |
| <b>Thermal option</b>                                                 | Include temperature loads       |
| <b>Zero strain temperature</b>                                        | 298 Kelvin                      |
| <b>Include fluid pressure effects from SolidWorks Flow Simulation</b> | Off                             |
| <b>Solver type</b>                                                    | FFEPlus                         |

|                                     |                                                                                       |
|-------------------------------------|---------------------------------------------------------------------------------------|
| <b>Inplane Effect:</b>              | Off                                                                                   |
| <b>Soft Spring:</b>                 | Off                                                                                   |
| <b>Inertial Relief:</b>             | Off                                                                                   |
| <b>Incompatible bonding options</b> | Automatic                                                                             |
| <b>Large displacement</b>           | Off                                                                                   |
| <b>Compute free body forces</b>     | On                                                                                    |
| <b>Friction</b>                     | Off                                                                                   |
| <b>Use Adaptive Method:</b>         | Off                                                                                   |
| <b>Result folder</b>                | SolidWorks document<br>(C:\Users\149306\Desktop\Solidworks<br>2013\Oedometer Project) |

#### Units

|                            |                  |
|----------------------------|------------------|
| <b>Unit system:</b>        | SI (MKS)         |
| <b>Length/Displacement</b> | mm               |
| <b>Temperature</b>         | Kelvin           |
| <b>Angular velocity</b>    | Rad/sec          |
| <b>Pressure/Stress</b>     | N/m <sup>2</sup> |

#### Material Properties

| Model Reference                                                                     | Properties                                                                                                                                                                                                                                                                                                                                                                                                                                                                    | Components                                                   |
|-------------------------------------------------------------------------------------|-------------------------------------------------------------------------------------------------------------------------------------------------------------------------------------------------------------------------------------------------------------------------------------------------------------------------------------------------------------------------------------------------------------------------------------------------------------------------------|--------------------------------------------------------------|
| 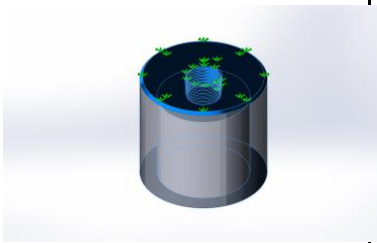 | <p>Name: <b>AISI 316 Stainless Steel Sheet (SS)</b></p> <p>Model type: <b>Linear Elastic Isotropic</b></p> <p>Default failure criterion: <b>Max von Mises Stress</b></p> <p>Yield strength: <b>25000 psi</b></p> <p>Tensile strength: <b>84121.9 psi</b></p> <p>Elastic modulus: <b>2.79923e+007 psi</b></p> <p>Poisson's ratio: <b>0.27</b></p> <p>Mass density: <b>0.289018 lb/in<sup>3</sup></b></p> <p>Thermal expansion coefficient: <b>8.88889e-006 /Fahrenheit</b></p> | <b>SolidBody 1(Cut-Sweep2)(Oedometer Hydraulic Cylinder)</b> |
| Curve Data:N/A                                                                      |                                                                                                                                                                                                                                                                                                                                                                                                                                                                               |                                                              |

#### Loads and Fixtures

| Fixture name | Fixture Image                                                                     | Fixture Details    |                                           |
|--------------|-----------------------------------------------------------------------------------|--------------------|-------------------------------------------|
| Fixed-1      | 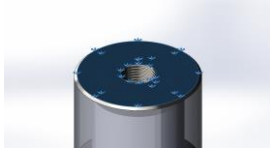 | Entities:<br>Type: | <b>1 face(s)</b><br><b>Fixed Geometry</b> |

| Load name  | Load Image                                                                        | Load Details                               |                                                                                 |
|------------|-----------------------------------------------------------------------------------|--------------------------------------------|---------------------------------------------------------------------------------|
| Pressure-1 | 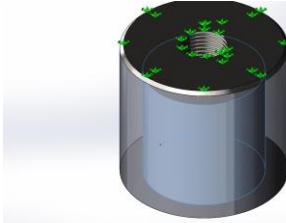 | Entities:<br>Type:<br><br>Value:<br>Units: | <b>1 face(s)</b><br><b>Normal to selected face</b><br><b>4000</b><br><b>psi</b> |

## Study Results

| Name           | Type                  | Min                      | Max                      |
|----------------|-----------------------|--------------------------|--------------------------|
| <b>Stress1</b> | VON: von Mises Stress | 105.161 psi<br>Node: 935 | 16005.8 psi<br>Node: 233 |

Model name: Oedometer Hydraulic Cylinder  
Study name: hydraulic chamber for oedometer  
Plot type: Static nodal stress: Stress1  
Deformation scale: 530.274

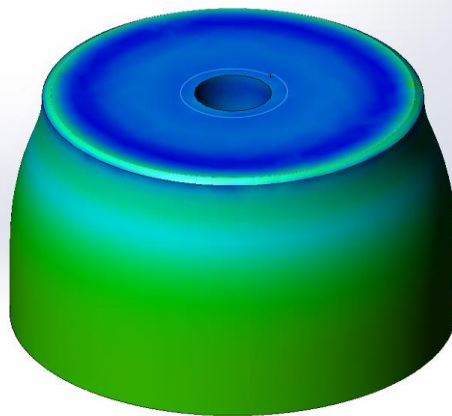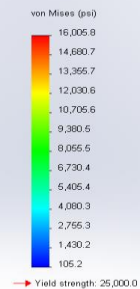

Oedometer Hydraulic Cylinder-hydraulic chamber for oedometer-Stress-Stress1

| Name                 | Type                         | Min               | Max                          |
|----------------------|------------------------------|-------------------|------------------------------|
| <b>Displacement1</b> | URES: Resultant Displacement | 0 mm<br>Node: 236 | 0.00693973 mm<br>Node: 11718 |

Model name: Oedometer Hydraulic Cylinder  
Study name: hydraulic chamber for oedometer  
Plot type: Static displacement Displacement1  
Deformation scale: 530.274

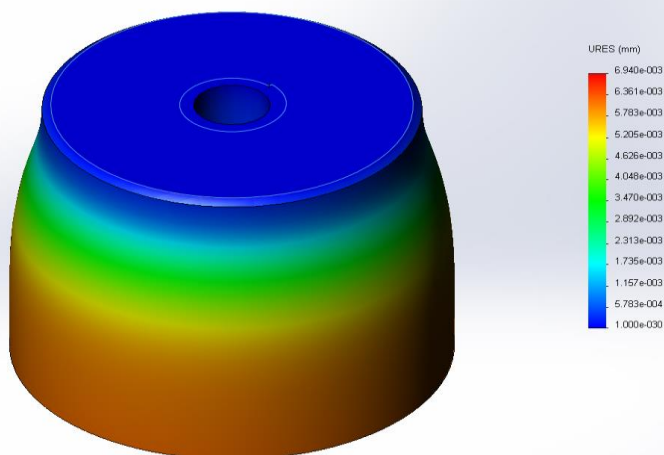

Oedometer Hydraulic Cylinder-hydraulic chamber for oedometer-Displacement-Displacement1

| Name           | Type                     | Min                           | Max                          |
|----------------|--------------------------|-------------------------------|------------------------------|
| <b>Strain1</b> | ESTRN: Equivalent Strain | 1.01087e-005<br>Element: 2577 | 0.000458968<br>Element: 5076 |

Model name: Oedometer Hydraulic Cylinder  
Study name: hydraulic chamber for oedometer  
Plot type: Static strain Strain1  
Deformation scale: 530.274

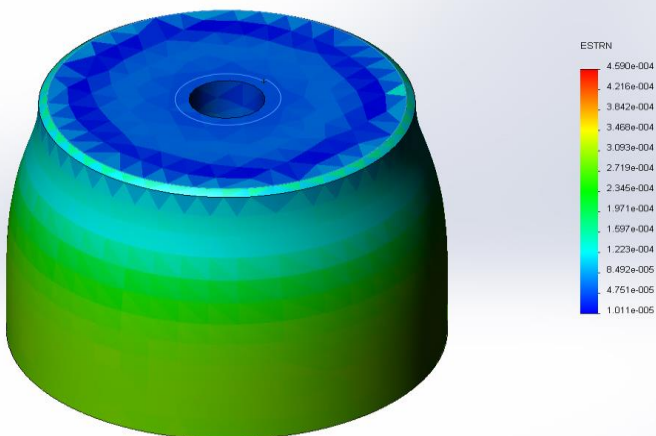

Oedometer Hydraulic Cylinder-hydraulic chamber for oedometer-Strain-Strain1

| Name                     | Type                 | Min                  | Max                  |
|--------------------------|----------------------|----------------------|----------------------|
| <b>Factor of Safety1</b> | Max von Mises Stress | 5.25573<br>Node: 233 | 799.938<br>Node: 935 |

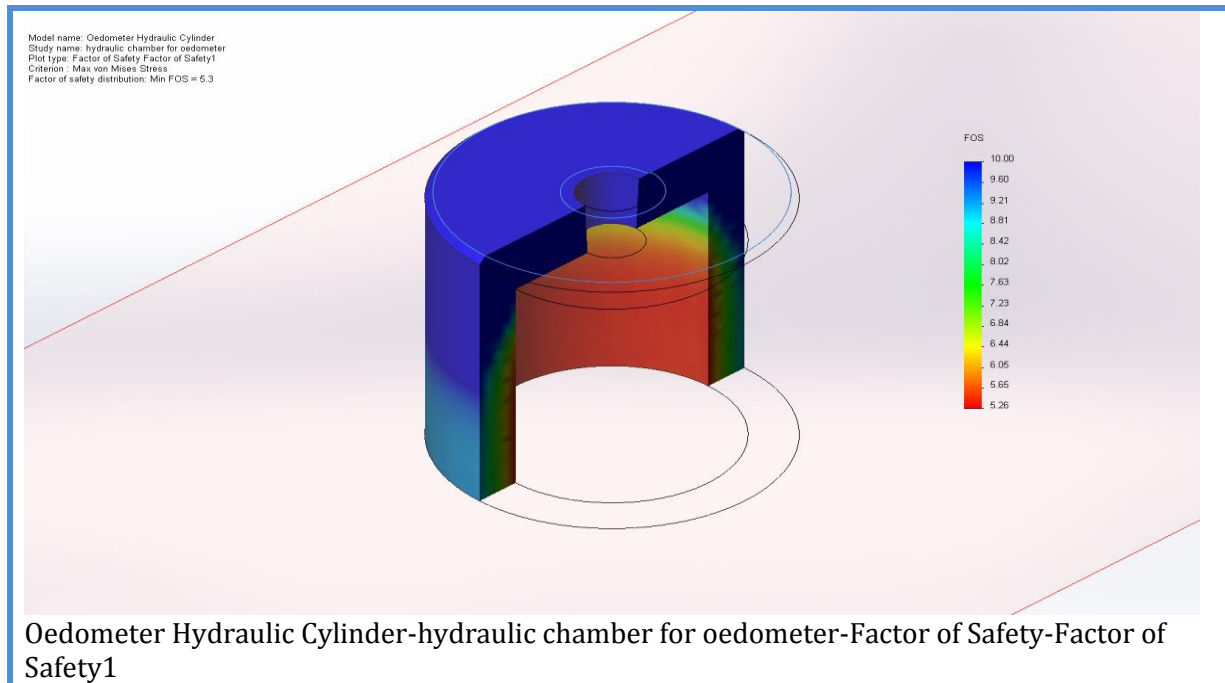

## **B. Simulation of CO<sub>2</sub> cylinder for Porous Media Ram.**

**Date:** Tuesday, July 30, 2013

**Designer:** M. Taylor

**Study name:** CO<sub>2</sub> chamber study

**Analysis type:** Static

### **Description**

This report contains detailed information from a finite element stress analysis performed on the porous media ram cylinder, a part of the Los Alamos designed oedometer from July of 2013. A Solidworks FEA stress analysis was performed using the Solidworks Simulation software. In this study, the model was subjected to a simulated 4,000 psi hydrostatic load on all pressure exposed surfaces.

### **Conclusion**

Although the stated minimum factor of safety is reported at 2.3, though it is evident from the stress map, this stress level is only found at one spot on an internal surface that is blanketed by layers of lower stressed material. The functional minimum FOS is measured by the stresses on the external walls of the vessel that would have to rupture in order for a failure to occur. By that measure the minimum factor of safety appears to be >6.

## Model Information

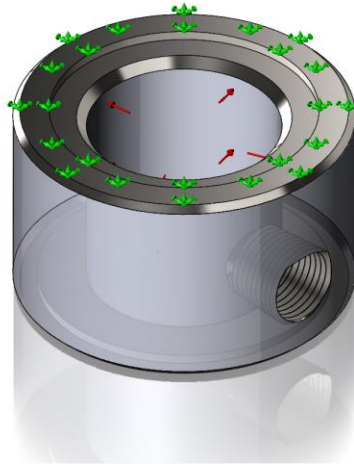

Model name: CO2 cylinder for ram  
Current Configuration: Default

### Solid Bodies

| Document Name and Reference                                                                       | Treated As | Volumetric Properties                                                                                        | Document Path/Date Modified                                                                                    |
|---------------------------------------------------------------------------------------------------|------------|--------------------------------------------------------------------------------------------------------------|----------------------------------------------------------------------------------------------------------------|
| Cut-Sweep1<br>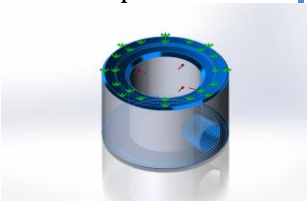 | Solid Body | Mass:0.205309 kg<br>Volume:2.55773e-005 m <sup>3</sup><br>Density:8027 kg/m <sup>3</sup><br>Weight:2.01203 N | C:\Users\149306\Desktop\Solidworks 2013\Oedometer Project\CO2 cylinder for ram.SLD PRT<br>Jul 25 08:40:33 2013 |

## Study Properties

|            |                   |
|------------|-------------------|
| Study name | CO2 chamber study |
|------------|-------------------|

|                                                                       |                                                                                       |
|-----------------------------------------------------------------------|---------------------------------------------------------------------------------------|
| <b>Analysis type</b>                                                  | Static                                                                                |
| <b>Mesh type</b>                                                      | Solid Mesh                                                                            |
| <b>Thermal Effect:</b>                                                | On                                                                                    |
| <b>Thermal option</b>                                                 | Include temperature loads                                                             |
| <b>Zero strain temperature</b>                                        | 298 Kelvin                                                                            |
| <b>Include fluid pressure effects from SolidWorks Flow Simulation</b> | Off                                                                                   |
| <b>Solver type</b>                                                    | FFEPlus                                                                               |
| <b>Inplane Effect:</b>                                                | Off                                                                                   |
| <b>Soft Spring:</b>                                                   | Off                                                                                   |
| <b>Inertial Relief:</b>                                               | Off                                                                                   |
| <b>Incompatible bonding options</b>                                   | Automatic                                                                             |
| <b>Large displacement</b>                                             | Off                                                                                   |
| <b>Compute free body forces</b>                                       | On                                                                                    |
| <b>Friction</b>                                                       | Off                                                                                   |
| <b>Use Adaptive Method:</b>                                           | Off                                                                                   |
| <b>Result folder</b>                                                  | SolidWorks document<br>(C:\Users\149306\Desktop\Solidworks<br>2013\Oedometer Project) |

## Units

|                            |                  |
|----------------------------|------------------|
| <b>Unit system:</b>        | SI (MKS)         |
| <b>Length/Displacement</b> | mm               |
| <b>Temperature</b>         | Kelvin           |
| <b>Angular velocity</b>    | Rad/sec          |
| <b>Pressure/Stress</b>     | N/m <sup>2</sup> |

## Material Properties

| Model Reference                                                                   | Properties                                                                                                                                                                                                                                                                                                                                                                                                                                                                                                                                             | Components                                           |
|-----------------------------------------------------------------------------------|--------------------------------------------------------------------------------------------------------------------------------------------------------------------------------------------------------------------------------------------------------------------------------------------------------------------------------------------------------------------------------------------------------------------------------------------------------------------------------------------------------------------------------------------------------|------------------------------------------------------|
| 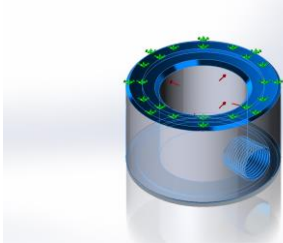 | <p>Name: <b>AISI Type 316L stainless steel</b></p> <p>Model type: <b>Linear Elastic Isotropic</b></p> <p>Default failure criterion: <b>Max von Mises Stress</b></p> <p>Yield strength: <b>1.7e+008 N/m<sup>2</sup></b></p> <p>Tensile strength: <b>4.85e+008 N/m<sup>2</sup></b></p> <p>Elastic modulus: <b>2e+011 N/m<sup>2</sup></b></p> <p>Poisson's ratio: <b>0.265</b></p> <p>Mass density: <b>8027 kg/m<sup>3</sup></b></p> <p>Shear modulus: <b>8.2e+010 N/m<sup>2</sup></b></p> <p>Thermal expansion coefficient: <b>1.65e-005 /Kelvin</b></p> | <b>SolidBody 1(Cut-Sweep1)(CO2 cylinder for ram)</b> |
| Curve Data:N/A                                                                    |                                                                                                                                                                                                                                                                                                                                                                                                                                                                                                                                                        |                                                      |

## Loads and Fixtures

| Fixture name | Fixture Image                                                                       | Fixture Details                                                      |
|--------------|-------------------------------------------------------------------------------------|----------------------------------------------------------------------|
| Fixed-1      | 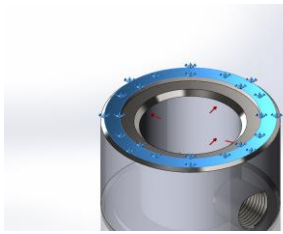 | <p>Entities: <b>1 face(s)</b></p> <p>Type: <b>Fixed Geometry</b></p> |

| Load name  | Load Image                                                                          | Load Details                                                                                                                     |
|------------|-------------------------------------------------------------------------------------|----------------------------------------------------------------------------------------------------------------------------------|
| Pressure-1 | 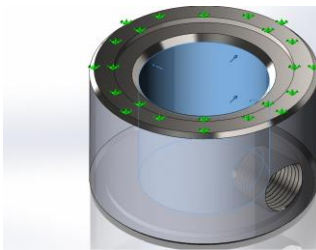 | <p>Entities: <b>1 face(s)</b></p> <p>Type: <b>Normal to selected face</b></p> <p>Value: <b>4000</b></p> <p>Units: <b>psi</b></p> |

## Mesh Information

|                      |                      |
|----------------------|----------------------|
| Mesh type            | Solid Mesh           |
| Mesher Used:         | Curvature based mesh |
| Jacobian points      | 4 Points             |
| Maximum element size | 0 in                 |



|                      |      |
|----------------------|------|
| Minimum element size | 0 in |
| Mesh Quality         | High |

Resultant Forces

Reaction Forces

| Selection set | Units | Sum X   | Sum Y      | Sum Z      | Resultant |
|---------------|-------|---------|------------|------------|-----------|
| Entire Model  | N     | 1632.02 | -0.0420494 | 0.00940323 | 1632.02   |

Reaction Moments

| Selection set | Units | Sum X | Sum Y | Sum Z | Resultant |
|---------------|-------|-------|-------|-------|-----------|
| Entire Model  | N-m   | 0     | 0     | 0     | 0         |

## Study Results

| Name    | Type                  | Min                        | Max                      |
|---------|-----------------------|----------------------------|--------------------------|
| Stress1 | VON: von Mises Stress | 500.722 psi<br>Node: 14896 | 30858.1 psi<br>Node: 220 |

Model name: CO2 cylinder for ram  
Study name: CO2 chamber study  
Plot type: Static nodal stress Stress1  
Deformation scale: 826.335

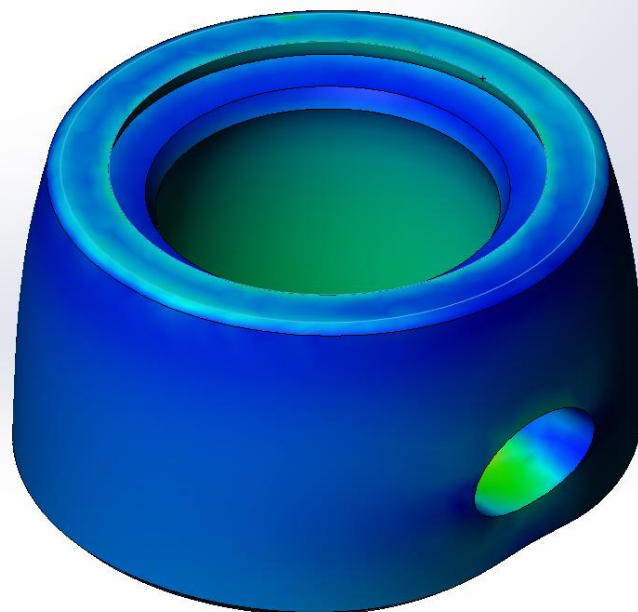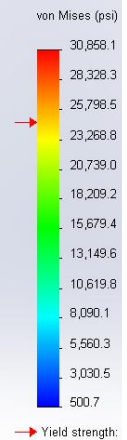

CO2 cylinder for ram-CO2 chamber study-Stress-Stress1

| Name | Type | Min | Max |
|------|------|-----|-----|
|------|------|-----|-----|

|                      |                              |                 |                           |
|----------------------|------------------------------|-----------------|---------------------------|
| <b>Displacement1</b> | URES: Resultant Displacement | 0 mm<br>Node: 1 | 0.0053904 mm<br>Node: 945 |
|----------------------|------------------------------|-----------------|---------------------------|

Model name: CO2 cylinder for ram  
 Study name: CO2 chamber study  
 Plot type: Static displacement Displacement1  
 Deformation scale: 626.335

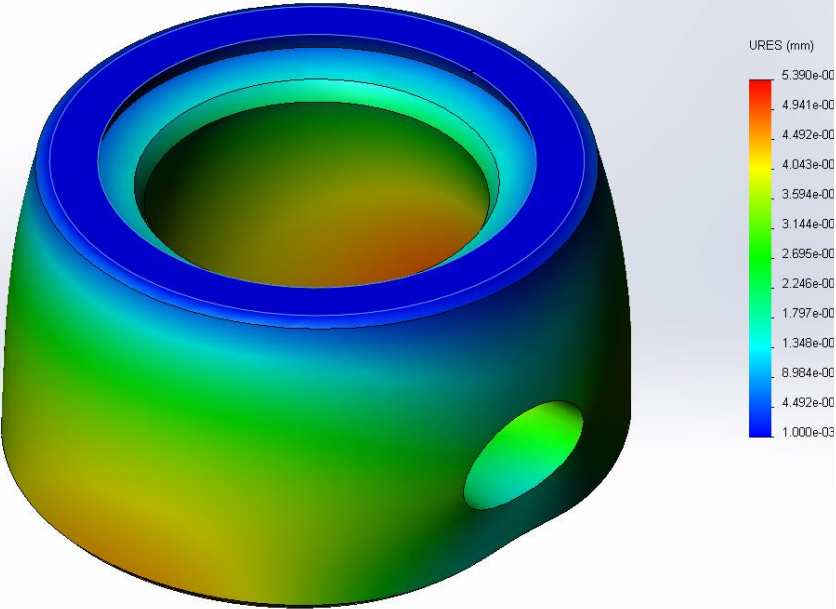

CO2 cylinder for ram-CO2 chamber study-Displacement-Displacement1

| Name           | Type                     | Min                           | Max                          |
|----------------|--------------------------|-------------------------------|------------------------------|
| <b>Strain1</b> | ESTRN: Equivalent Strain | 1.43285e-005<br>Element: 7154 | 0.000641117<br>Element: 4797 |

Model name: CO2 cylinder for ram  
Study name: CO2 chamber study  
Plot type: Static strain Strain1  
Deformation scale: 626.335

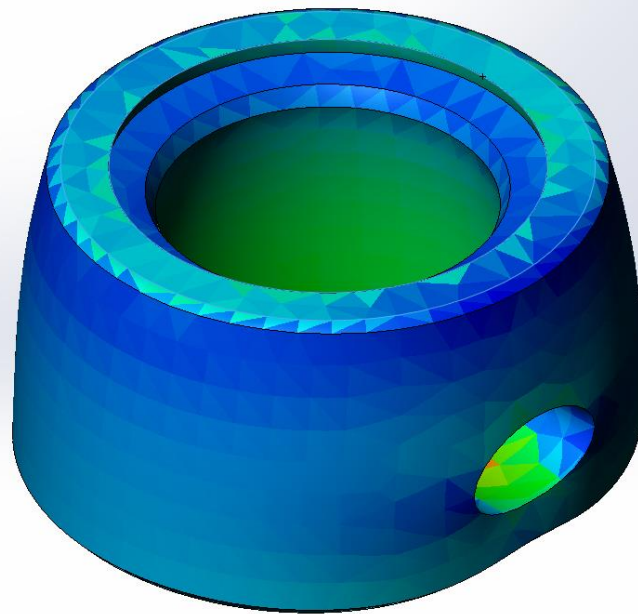

CO2 cylinder for ram-CO2 chamber study-Strain-Strain1

| Name              | Type                 | Min                  | Max                    |
|-------------------|----------------------|----------------------|------------------------|
| Factor of Safety1 | Max von Mises Stress | 2.27957<br>Node: 220 | 140.484<br>Node: 14896 |

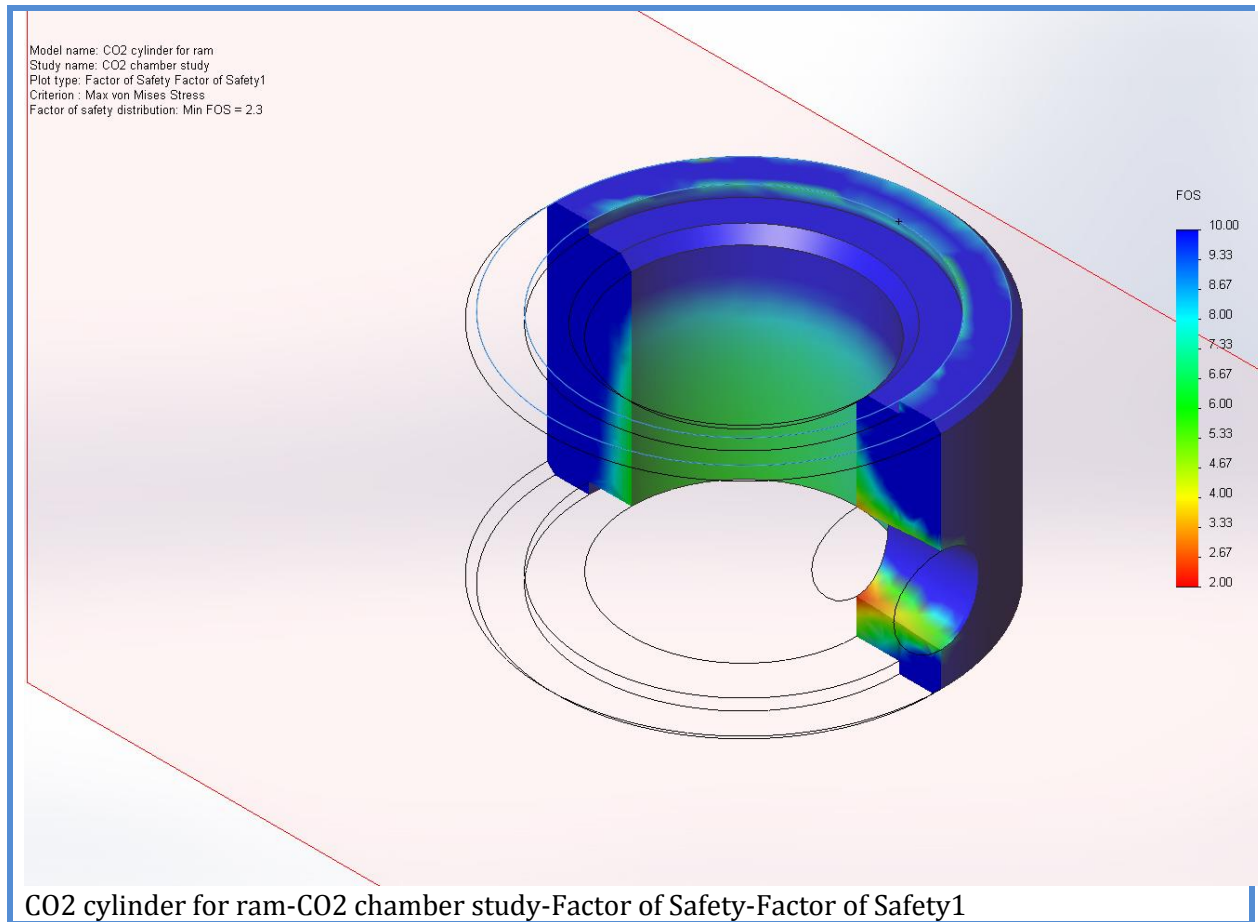

### C. Stress Simulation of Oedometer sample holder and neutron windows

**Date:** Tuesday, July 30, 2013

**Designer:** M. Taylor

**Study name:** Sample chamber study

**Analysis type:** Static

#### **Description**

The sample chamber of the Los Alamos designed oedometer proposed in July of 2013 was designed in Solidworks and an FEA stress analysis was performed using the Solidworks Simulation software. In this study, the model was subjected to a simulated 4,000 psi hydrostatic load on all pressure exposed surfaces.

#### **Conclusion**

Although the stated minimum factor of safety is reported at 2.1, it is evident that this stress level is only found on internal surfaces that are blanketed by layers of lower stressed material. The actually minimum should be measured by the stresses on the external walls of the vessel that

would have to rupture in order for a failure to occur. By that measure the minimum factor of safety appears to be  $>6$ .

## Model Information

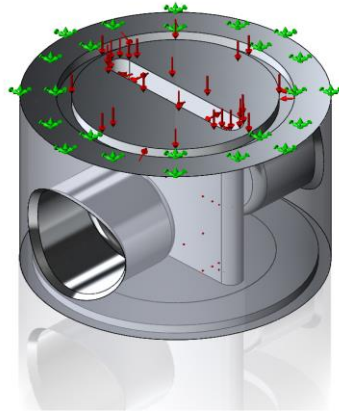

Model name: Oedometer sample holder  
Current Configuration: Default

### Solid Bodies

| Document Name and Reference                                                                          | Treated As | Volumetric Properties                                                                                          | Document Path/Date Modified                                                                                                              |
|------------------------------------------------------------------------------------------------------|------------|----------------------------------------------------------------------------------------------------------------|------------------------------------------------------------------------------------------------------------------------------------------|
| Cut-Extrude11<br>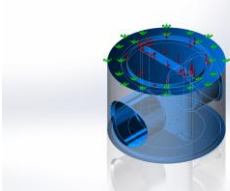 | Solid Body | Mass:0.0643858 kg<br>Volume:2.29131e-005 m <sup>3</sup><br>Density:2810 kg/m <sup>3</sup><br>Weight:0.630981 N | C:\Users\149306\Desktop\Solid works 2013\Oedometer Project\Fabrication folder for Oedometer sample holder.SLDPRT<br>Jul 30 09:14:58 2013 |

## Study Properties

|                                                                       |                                                                                                                           |
|-----------------------------------------------------------------------|---------------------------------------------------------------------------------------------------------------------------|
| <b>Study name</b>                                                     | Sample chamber study                                                                                                      |
| <b>Analysis type</b>                                                  | Static                                                                                                                    |
| <b>Mesh type</b>                                                      | Solid Mesh                                                                                                                |
| <b>Thermal Effect:</b>                                                | On                                                                                                                        |
| <b>Thermal option</b>                                                 | Include temperature loads                                                                                                 |
| <b>Zero strain temperature</b>                                        | 298 Kelvin                                                                                                                |
| <b>Include fluid pressure effects from SolidWorks Flow Simulation</b> | Off                                                                                                                       |
| <b>Solver type</b>                                                    | FFEPlus                                                                                                                   |
| <b>Inplane Effect:</b>                                                | Off                                                                                                                       |
| <b>Soft Spring:</b>                                                   | Off                                                                                                                       |
| <b>Inertial Relief:</b>                                               | Off                                                                                                                       |
| <b>Incompatible bonding options</b>                                   | Automatic                                                                                                                 |
| <b>Large displacement</b>                                             | Off                                                                                                                       |
| <b>Compute free body forces</b>                                       | On                                                                                                                        |
| <b>Friction</b>                                                       | Off                                                                                                                       |
| <b>Use Adaptive Method:</b>                                           | Off                                                                                                                       |
| <b>Result folder</b>                                                  | SolidWorks document<br>(C:\Users\149306\Desktop\Solidworks<br>2013\Oedometer Project\Fabrication folder for<br>Oedometer) |

## Units

|                            |                  |
|----------------------------|------------------|
| <b>Unit system:</b>        | SI (MKS)         |
| <b>Length/Displacement</b> | mm               |
| <b>Temperature</b>         | Kelvin           |
| <b>Angular velocity</b>    | Rad/sec          |
| <b>Pressure/Stress</b>     | N/m <sup>2</sup> |

## Material Properties

| Model Reference                                                                   | Properties                                                                                                                                                                                                                                                                                                                                                                                                                                | Components                                                 |
|-----------------------------------------------------------------------------------|-------------------------------------------------------------------------------------------------------------------------------------------------------------------------------------------------------------------------------------------------------------------------------------------------------------------------------------------------------------------------------------------------------------------------------------------|------------------------------------------------------------|
| 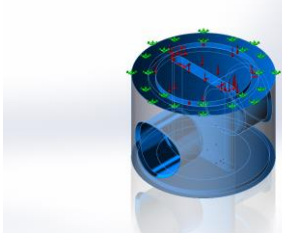 | Name: <b>7075-T6 (SN)</b><br>Model type: <b>Linear Elastic Isotropic</b><br>Default failure criterion: <b>Max von Mises Stress</b><br>Yield strength: <b>5.05e+008 N/m^2</b><br>Tensile strength: <b>5.7e+008 N/m^2</b><br>Elastic modulus: <b>7.2e+010 N/m^2</b><br>Poisson's ratio: <b>0.33</b><br>Mass density: <b>2810 kg/m^3</b><br>Shear modulus: <b>2.69e+010 N/m^2</b><br>Thermal expansion coefficient: <b>2.36e-005 /Kelvin</b> | <b>SolidBody 1(Cut-Extrude11)(Oedometer sample holder)</b> |
| Curve Data:N/A                                                                    |                                                                                                                                                                                                                                                                                                                                                                                                                                           |                                                            |

## Loads and Fixtures

| Fixture name | Fixture Image                                                                      | Fixture Details                                           |
|--------------|------------------------------------------------------------------------------------|-----------------------------------------------------------|
| Fixed-2      | 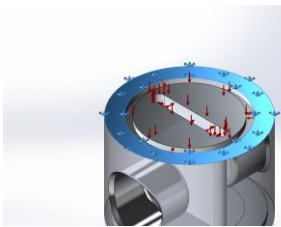 | <b>Entities:</b> 1 face(s)<br><b>Type:</b> Fixed Geometry |

| Resultant Forces     |          |         |         |           |
|----------------------|----------|---------|---------|-----------|
| Components           | X        | Y       | Z       | Resultant |
| Reaction force(N)    | -23.1866 | 785.506 | 12.4389 | 785.946   |
| Reaction Moment(N-m) | 0        | 0       | 0       | 0         |

| Load name  | Load Image                                                                          | Load Details                                                                                                  |
|------------|-------------------------------------------------------------------------------------|---------------------------------------------------------------------------------------------------------------|
| Pressure-1 | 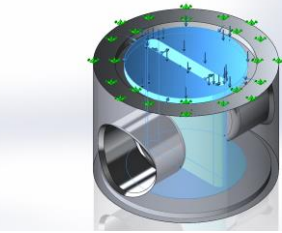 | Entities: <b>7 face(s)</b><br>Type: <b>Normal to selected face</b><br>Value: <b>4000</b><br>Units: <b>psi</b> |



## Mesh Information

|                          |               |
|--------------------------|---------------|
| Mesh type                | Solid Mesh    |
| Mesher Used:             | Standard mesh |
| Automatic Transition:    | Off           |
| Include Mesh Auto Loops: | Off           |
| Jacobian points          | 4 Points      |
| Element Size             | 0.11072 in    |
| Tolerance                | 0.00553601 in |
| Mesh Quality             | High          |

## Mesh Information - Details

|                                      |           |
|--------------------------------------|-----------|
| Total Nodes                          | 14266     |
| Total Elements                       | 8932      |
| Maximum Aspect Ratio                 | 4.8503    |
| % of elements with Aspect Ratio < 3  | 99.2      |
| % of elements with Aspect Ratio > 10 | 0         |
| % of distorted elements(Jacobian)    | 0         |
| Time to complete mesh(hh:mm:ss):     | 00:00:02  |
| Computer name:                       | PN1288161 |

Model name: Oedometer sample holder  
Study name: Sample chamber study  
Mesh type: Solid mesh

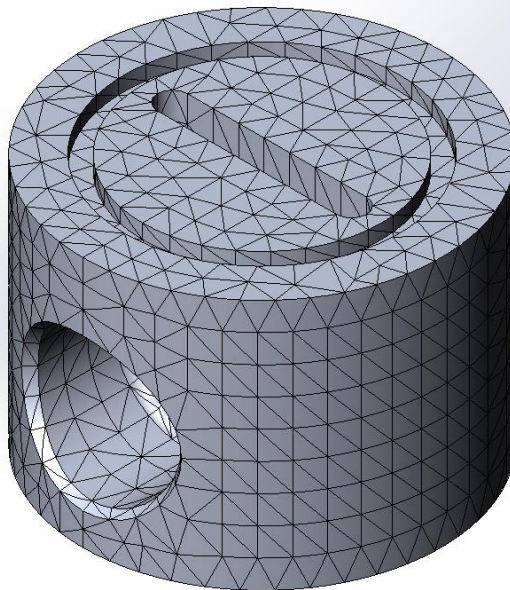

## Resultant Forces

### Reaction Forces

| Selection set | Units | Sum X    | Sum Y   | Sum Z   | Resultant |
|---------------|-------|----------|---------|---------|-----------|
| Entire Model  | N     | -23.1866 | 785.506 | 12.4389 | 785.946   |

### Reaction Moments

| Selection set | Units | Sum X | Sum Y | Sum Z | Resultant |
|---------------|-------|-------|-------|-------|-----------|
| Entire Model  | N-m   | 0     | 0     | 0     | 0         |

## Study Results

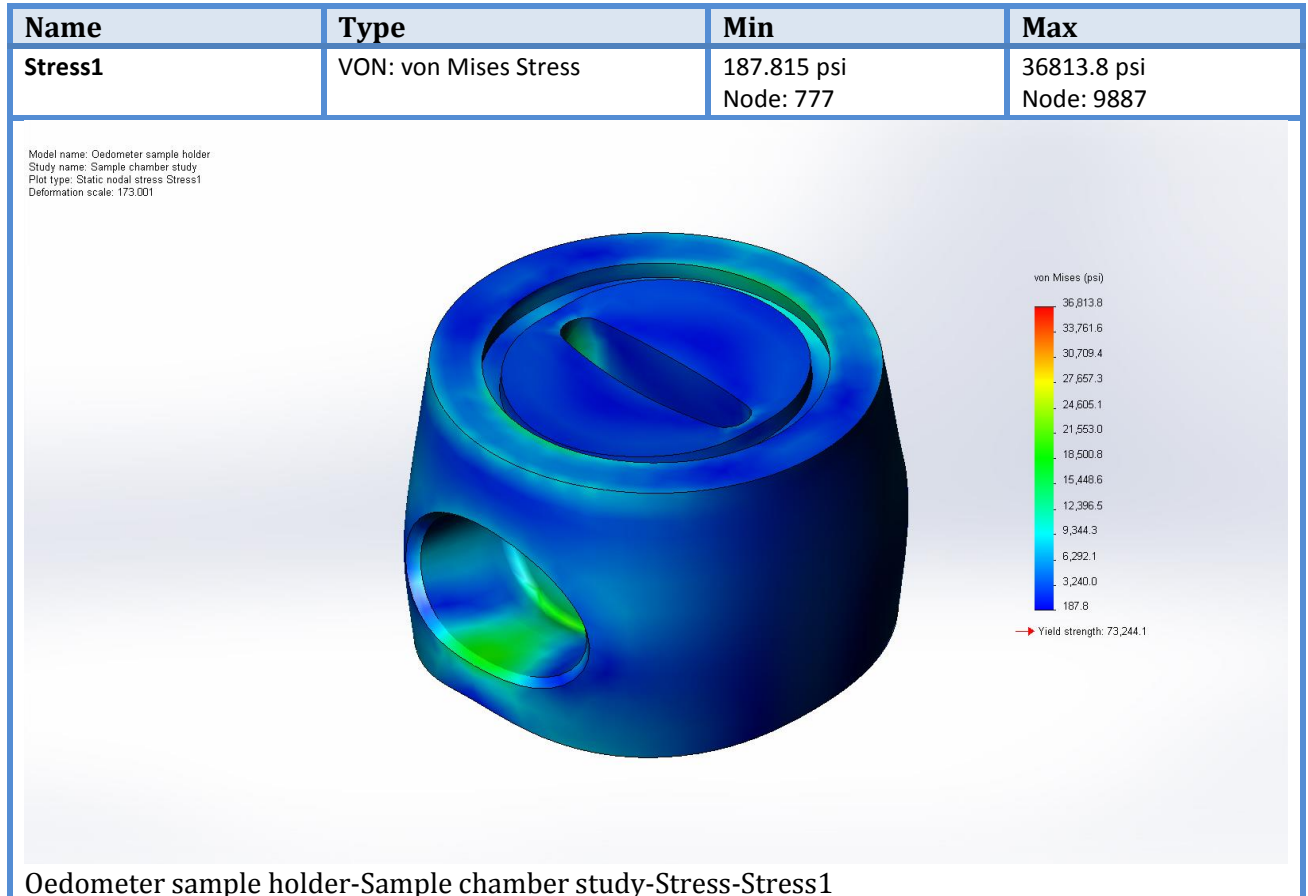

| Name                 | Type                         | Min               | Max                         |
|----------------------|------------------------------|-------------------|-----------------------------|
| <b>Displacement1</b> | URES: Resultant Displacement | 0 mm<br>Node: 221 | 0.0242887 mm<br>Node: 13858 |

Model name: Oedometer sample holder  
 Study name: Sample chamber study  
 Plot type: Static displacement Displacement1  
 Deformation scale: 173.001

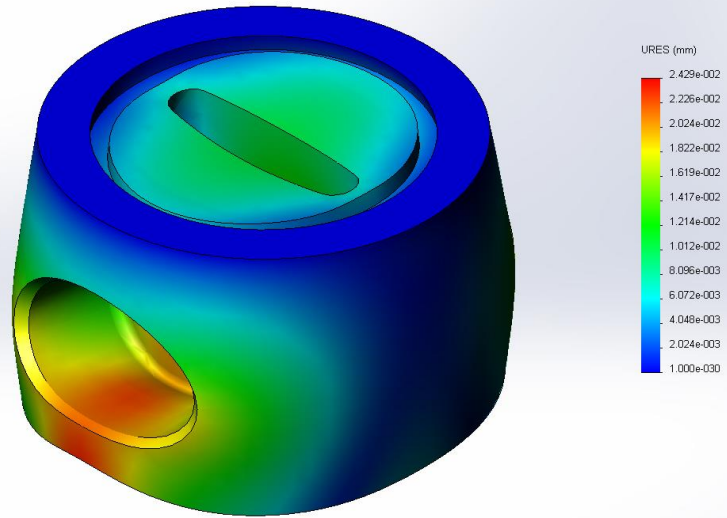

Oedometer sample holder-Sample chamber study-Displacement-Displacement1

| Name    | Type                     | Min                           | Max                         |
|---------|--------------------------|-------------------------------|-----------------------------|
| Strain1 | ESTRN: Equivalent Strain | 1.52814e-005<br>Element: 3169 | 0.00237791<br>Element: 2665 |

Model name: Oedometer sample holder  
 Study name: Sample chamber study  
 Plot type: Static strain Strain1  
 Deformation scale: 173.001

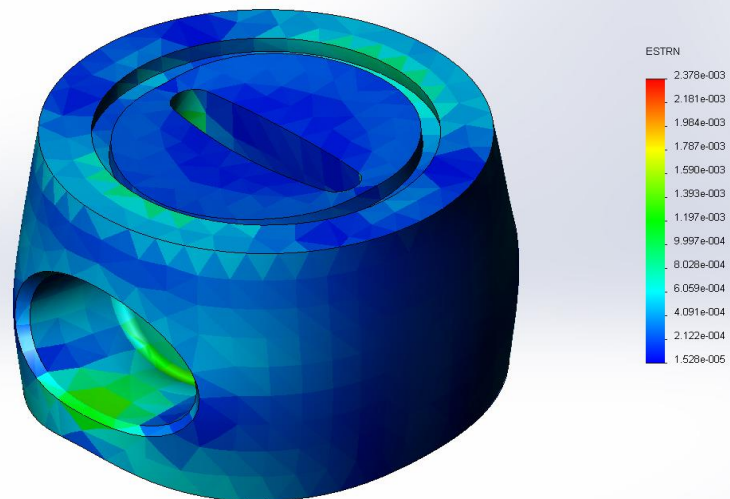

Oedometer sample holder-Sample chamber study-Strain-Strain1

| Name              | Type                 | Min                   | Max                  |
|-------------------|----------------------|-----------------------|----------------------|
| Factor of Safety1 | Max von Mises Stress | 2.24567<br>Node: 9887 | 440.174<br>Node: 777 |

Model name: Oedometer sample holder  
Study name: Sample chamber study  
Plot type: Factor of Safety Factor of Safety1  
Criterion: Max von Mises Stress  
Factor of safety distribution: Min FOS = 2.2

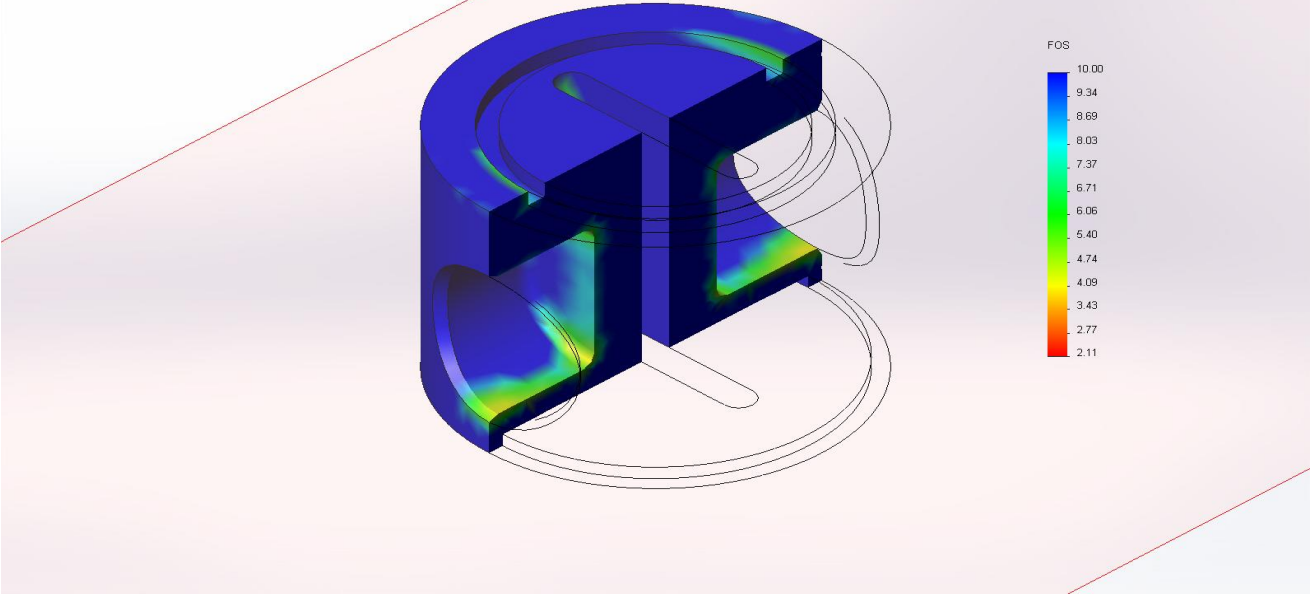

Oedometer sample holder-Sample chamber study-Factor of Safety-Factor of Safety1

The following figure is another view of the FOS. The figure contains the results of 5,200 psi, based on the yield strength of 7075 T6. The min FOS is shown on the left side of the figure legend with a value of 1.4.

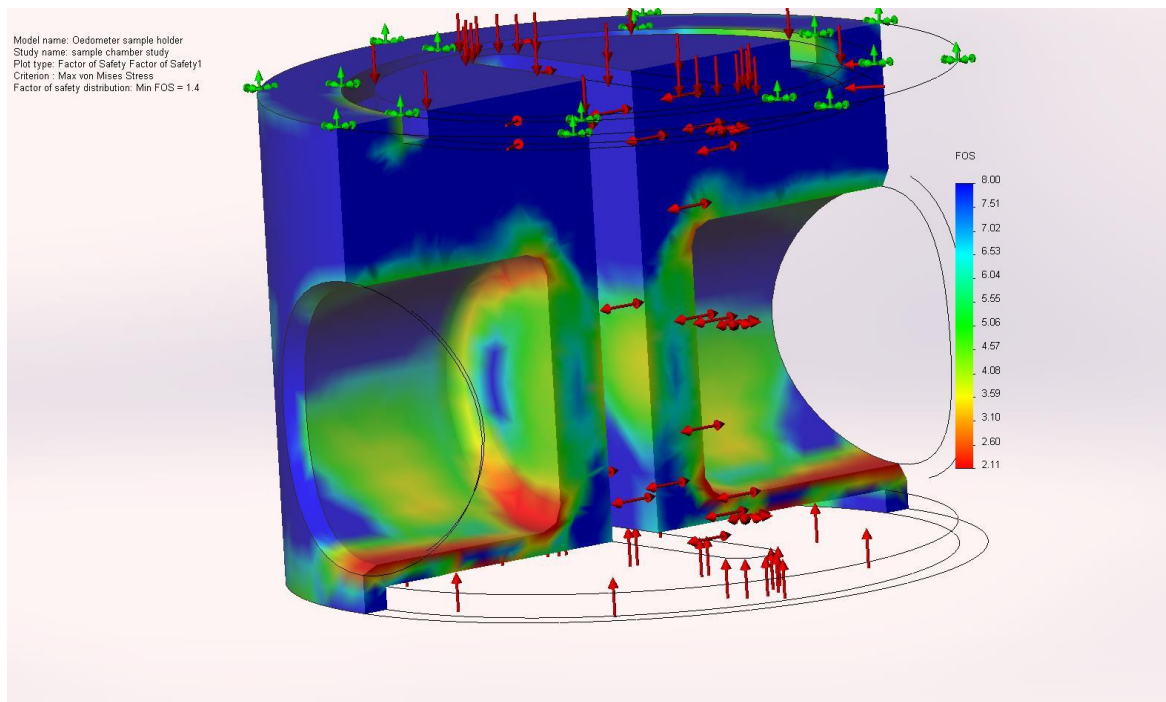

The following figure shows results using a finer mesh and is defined to show all places where the FOS is below 2. These areas should show in bright “red” based yield with a pressure of 4,000 psi. This means that according to the finite element analysis, there should have been no yielding until somewhere around 7,000 psi. According to the stress graph shown below the FOS graph, the maximum stress reached anywhere is 39,000psi, which is a little less than 3/5 of the yield strength.

Model name: Oedometer sample holder  
 Study name: 8-23-13 srudy  
 Plot type: Factor of Safety Factor of Safety1  
 Criterion : Max von Mises Stress  
 Red < FOS = 2 < Blue

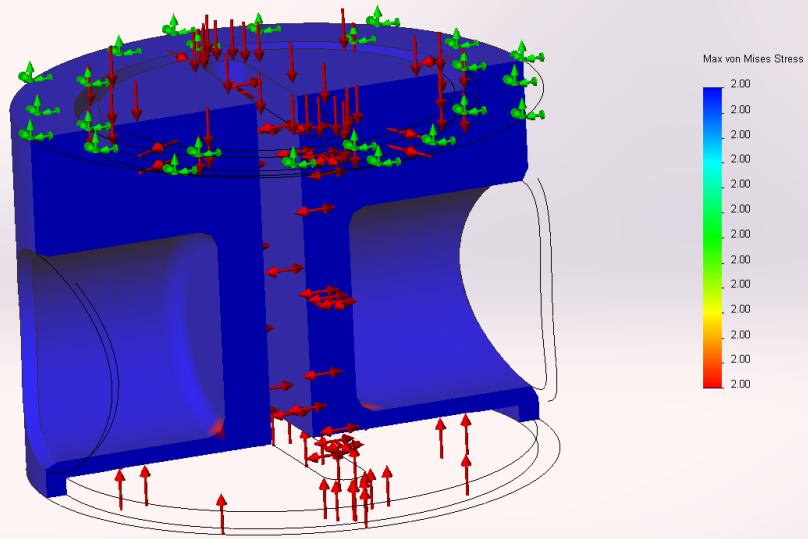

Model name: Oedometer sample holder  
 Study name: 8-23-13 srudy  
 Plot type: Static nodal stress Stress1  
 Deformation scale: 50

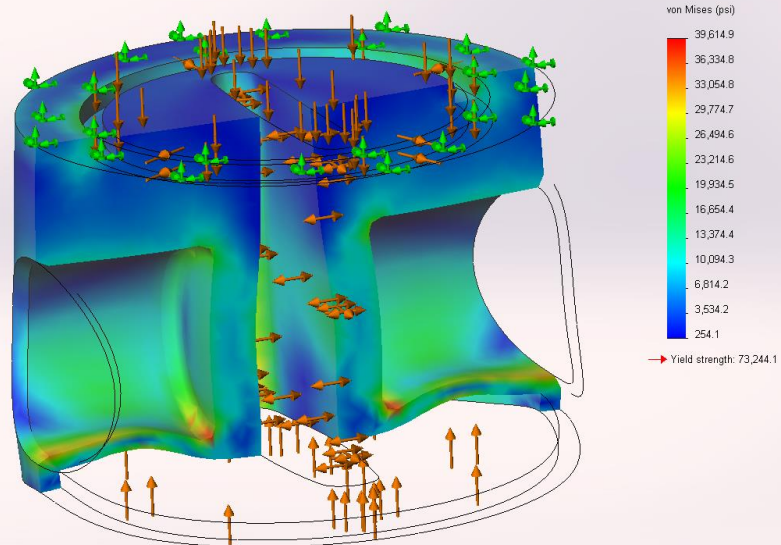

### ***S1.3. Design, Materials, and Finite Element Modeling of the Titanium Oedometer***

The Titanium (Ti) oedometer contains a 1-inch (2.54 cm) diameter inner sample cavity for measuring “swelling” pressure as induced by clay samples subjected to dry or hydrous (i.e., water-bearing), sub- to supercritical CO<sub>2</sub>. Figure S4 presents a schematic of the oedometer with annotation regarding fluid inlets and/or outlets, sample location, and dimensions. The maximum allowable working pressure (MAWP) of the entire oedometer system is 4000 psi (27.6 MPa).

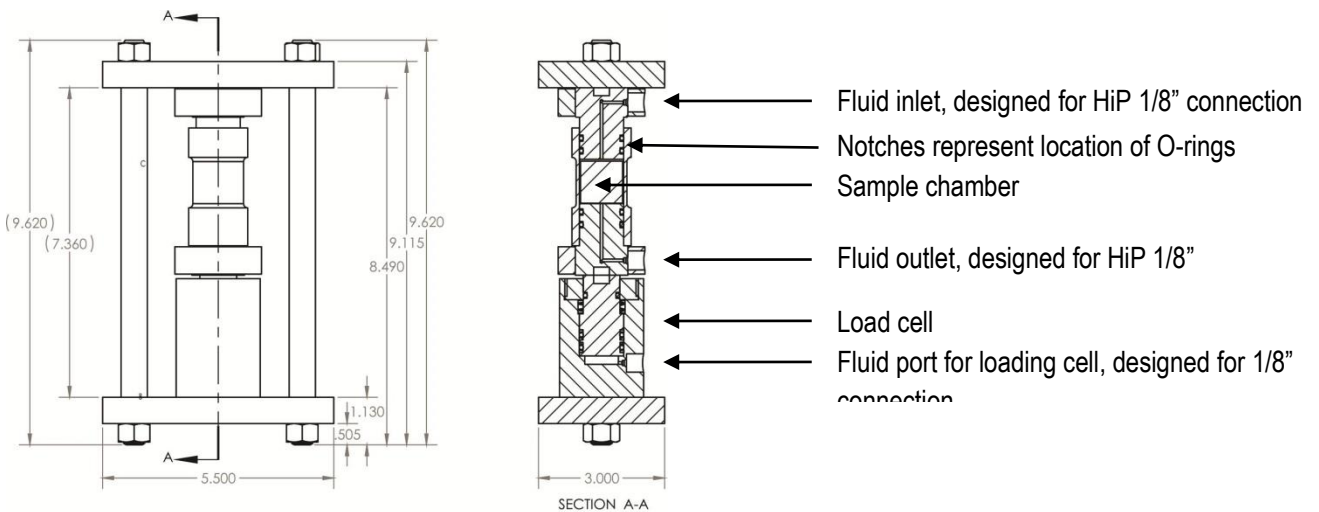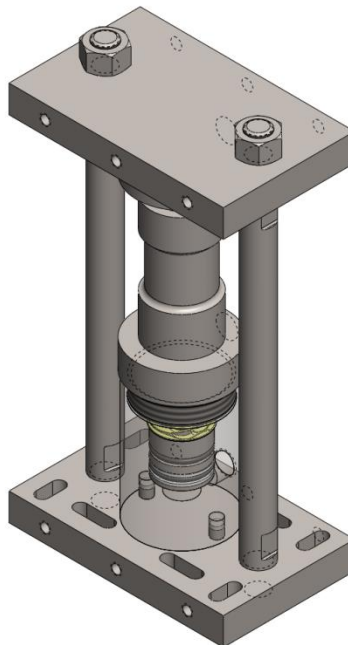

**Figure S4.** Schematic diagram of Ti oedometer (i.e., constant-volume pressure cell) with annotation indicated by arrows. Length dimensions are given in inches.

The oedometer is a custom-built design. The custom components include everything shown in the lower portion of Figure S4 (the 3D image), except for the o-rings and return spring within the load cell. The o-rings are composed of ethylene propylene and thus resistant to supercritical CO<sub>2</sub>. The oedometer design is based on the following:

- All titanium construction (Ti 6Al-4V), for low neutron attenuation (for potential neutron applications)
- Piston retraction spring
- Pressure vessel safety factor of 4x

A thin-wall pressure vessel stress analysis was performed on the sample housing to estimate the factor of safety against yielding for the chamber. The plot of von Mises stress versus wall thickness is shown in Figure S5 and was derived from equations S2-S5. The plot shows that with an ID of 1.05 in, an outer diameter of 1.21 in (0.079 in wall) provides a factor of safety of 4x against yielding.

$$\sigma_t = \frac{Pi*ri^2*\left(1+\frac{ro^2}{ri^2}\right)}{(ro^2-ri^2)} \quad (S2)$$

$$\sigma_r = \frac{Pi*ri^2}{(ro^2-ri^2)} * \left(1 - \frac{ro^2}{ri^2}\right) \quad (S3)$$

$$\sigma_z = 0 \quad (S4)$$



$$\sigma_{vm} = \sqrt{\frac{(\sigma_t - \sigma_r)^2 + (\sigma_r - \sigma_z)^2 + (\sigma_z - \sigma_t)^2}{2}} \quad (S5)$$

where  $\sigma_t$  is the tangential stress,  $\sigma_r$  is the radial stress,  $\sigma_z$  is the axial stress and  $\sigma_{vm}$  is the von Mises stress.  $P_i$ ,  $r_i$ , and  $r_o$  are the internal pressure, pressure vessel inside radius, and pressure vessel outside radius respectively.

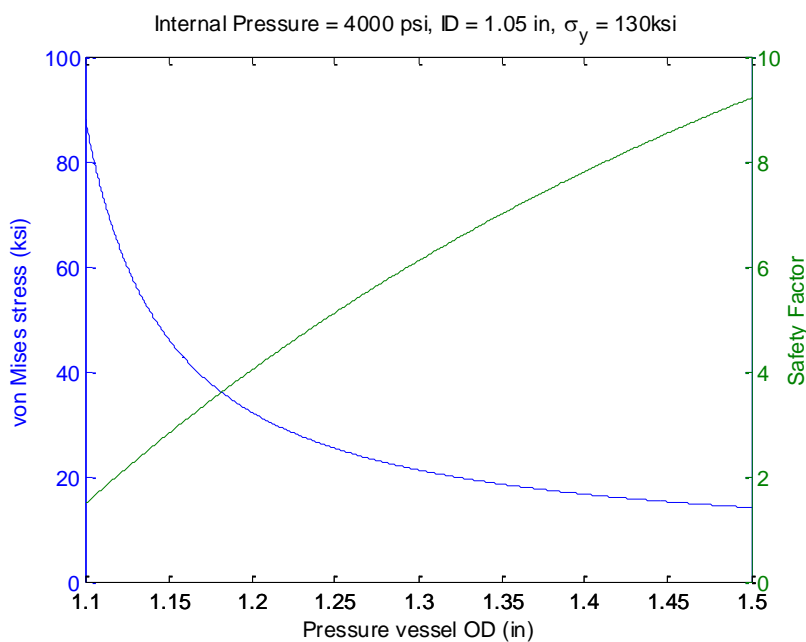

**Figure S5.** Result of thin-wall pressure vessel analysis to determine factor of safety for the sample chamber wall thickness.

A FEM analysis was performed on the actual part as a confirmation of the thin-wall analysis (Figure S6). The results of that simulation are shown below. For an internal pressure of 4000 psi, the von Mises stress in the housing is approximately 30 ksi. This is consistent with the thin-wall assumption for the previous analysis. The FEM results also show a factor of safety against yielding of 4x.

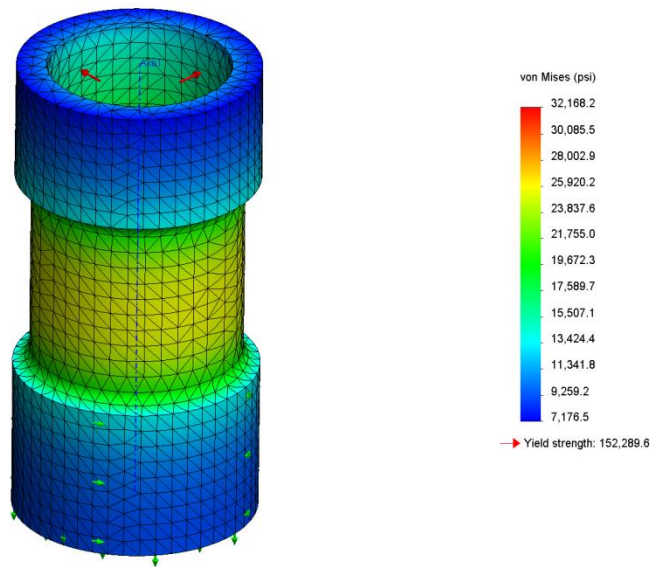

**Figure S6.** FEM analysis to determine factor of safety for the sample chamber wall thickness.

For the load cell portion of the oedometer, FEM was used to estimate the stresses in the body for a 4000 psi internal pressure. The results shown in Figure S7 indicate that there is substantial margin against yielding for the load cell portion of the vessel. Assuming a yield strength of 130 ksi, the factor of safety against yielding for the load cell housing is approximately 15x.

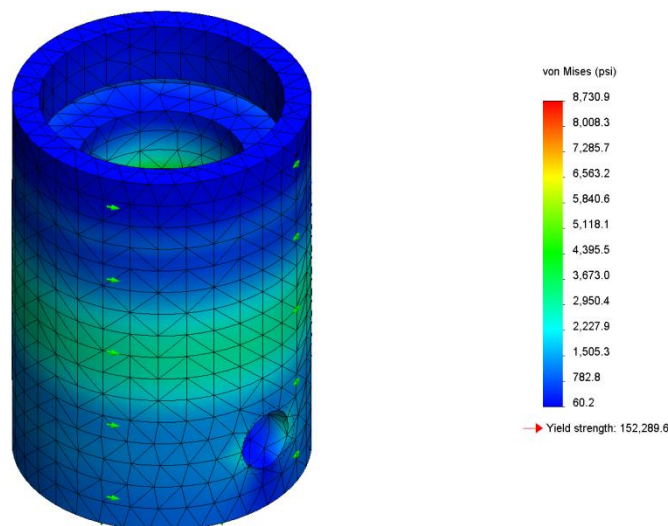

**Figure S7.** FEM analysis to determine factor of safety for the load cell.

Overpressure testing to 1.3 x MAWP (i.e., 5300 psi) was performed by filling the vessel sample chamber with water, plugging the ports and applying a pressure gradient to the peak pressure through the load cell housing. The fluid medium used to pressurize the load cell housing was Isopar H fluid. Once the fluid reached 5300 psi, it was held at constant pressure for seven hours to determine if leaks were present and measure any strain through strain gages mounted on the outside of the vessel within the gauge length. Two identical Ti oedometer vessels were built. One vessel is designated as Oedometer-Ti-A and Oedometer-Ti-B. Both vessels were tested using this procedure.

## **S2. Neutron Beam Transmission as a Function of Sample Thickness, and Assessment of Multiple Scattering and Anisotropy**

Calculations of neutron beam transmission through SWy-2 bentonite were performed using information from the NIST scattering length density online calculator at:

<https://www.ncnr.nist.gov/resources/sldcalc.html>. Transmission > 0.75 is sought to avoid multiple scattering. The compound name used in the calculator was the following, as only integer stoichiometry is supported in the calculator:

Ca<sub>12</sub>Na<sub>32</sub>K<sub>5</sub>Al<sub>303</sub>Fe<sub>41</sub>Mn<sub>1</sub>Mg<sub>54</sub>Ti<sub>2</sub>Si<sub>798</sub>Al<sub>2</sub>O<sub>2400</sub>H<sub>400</sub>. For the calculation, we assume pure smectite with no pore space. The NIST calculator provided scattering length density and neutron 1/e values, which were used in the following equation and to generate Figure S1:

$$T = \frac{I(d)}{I_0} = e^{-\Sigma_T d} \quad (S1)$$

A thickness of 3.08 mm corresponds to a transmission of 0.75 (Figure S1).

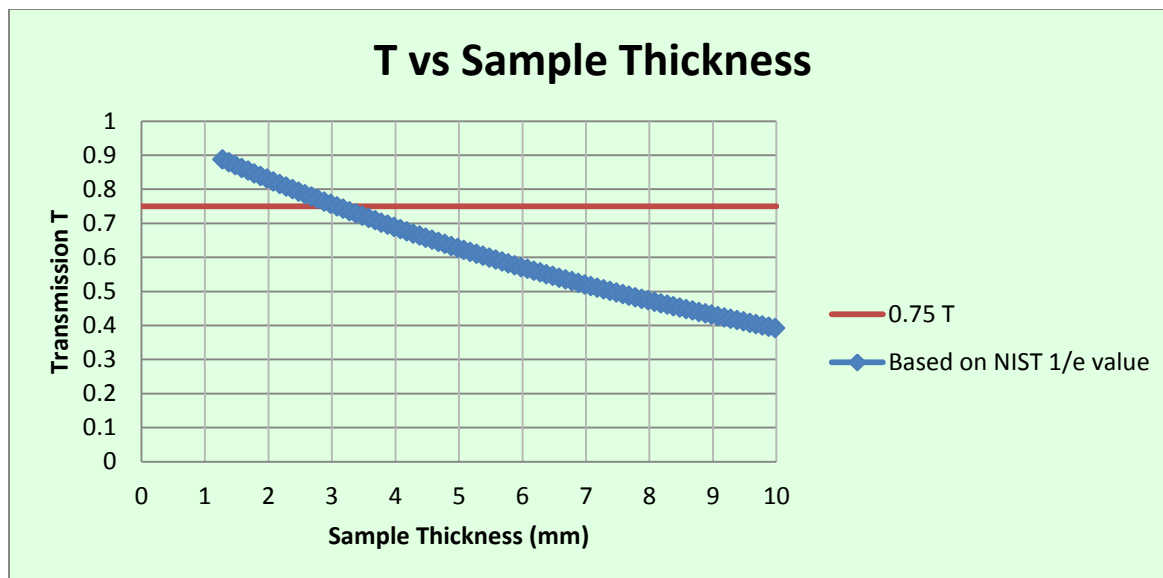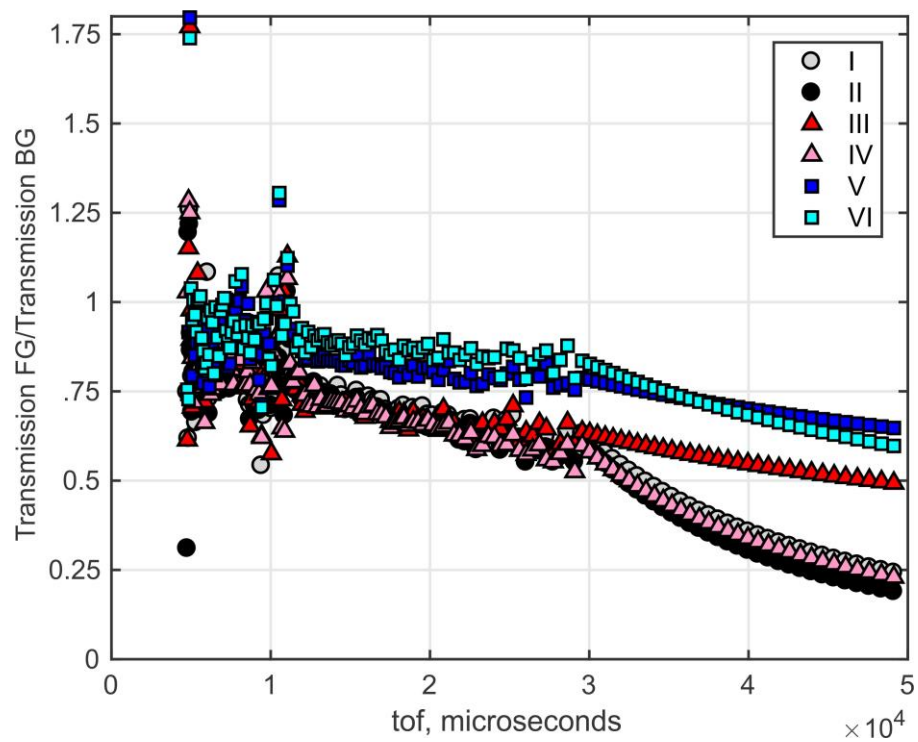

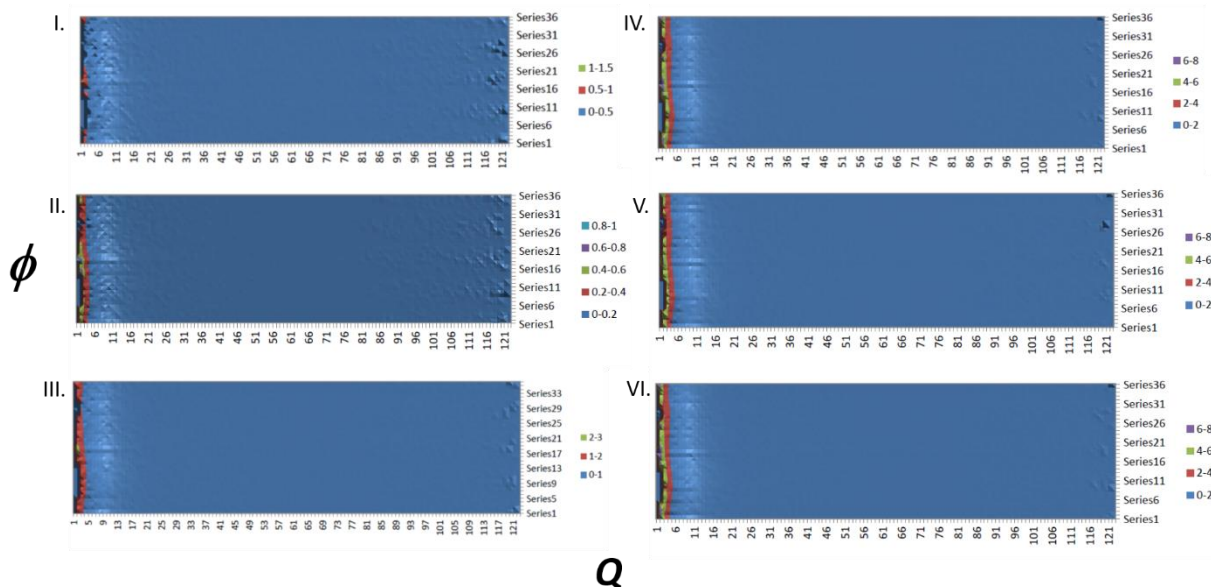

**Figure S8. (Top)** Neutron transmission versus sample thickness for SWy-2 bentonite. **(Middle)** Transmission of neutron beam through samples normalized by transmissions through the empty sample chamber versus time of flight (tof). Legend corresponds to Roman numerals of Section 3.2. **(Bottom)** Assessment of anisotropy in  $Q$  from assessment of  $Q$  variation as a function of azimuth,  $\phi$ . The lack of any cusps or horizontal “streaks” in  $Q$  suggest there is little anisotropy in the scattering vector response for all loading conditions in our Oedometric SANS experiments. Here we show raw pixel data and not derived  $Q$  values. Legend corresponds to Roman numerals of Section 3.2.

The greatest amounts of multiple scattering occur in the less consolidated sample measurements, and the dry  $\text{CO}_2$  measurement at zero effective stress (Figure S8 in Supporting Information).

Consolidation to higher effective stresses and wet pore conditions comparatively decreases multiple scattering.

### **S3. SANS Interpretation and Parameter Sensitivity**

Screenshots and information on the use of the Pore Size Distribution macros of the Irena package version 2.61 (Ilavsky and Jemian, 2009) with Igor Pro version 6.37 are given here. These screenshots are provided so that the reader can know exactly what parameters were chosen, and how the derivation of void distributions were done. These data are presented following the experimental stages as in main text (Section 3.1).

#### ***S3.1. Stage I Dry Consolidation***

Stage I is compression of the bentonite clay in the sample chamber at a mass of 1.7 g and initial volume of  $1.7206 \text{ cm}^3$  under  $\sim 5$  psig axial load on the hydraulic piston (or  $7.74 \times 5$  psig to obtain the load on the clay itself). The Unified Fit model requires one level only. The pore filling fluid is assumed to be at 1 atm (14.67 psia) and 100% nitrogen to represent air. Scattering length densities and contrast for the clay and nitrogen is given in Table 1 in the main text. Figure S9 presents the Unified Fit parameters and results. Figure S10 presents the pore size distribution. Note that to obtain fits, the errors are multiplied by a value less than 1. For comparison, a scattering contrast between clay and vacuum ( $10.753 \times 10^{20} \text{ cm}^{-4}$ ) results in a relative change for the size volume distribution from the clay-N<sub>2</sub> case by  $\sim 0.5\%$  or less. The choice of the final point at higher  $Q$  while fitting the data can affect the pore size distribution of the smallest scatterers. For example, choosing point 70 versus point 75 results in a shift of the peak to the smaller pore diameters with a higher peak, but the overall shape of the curve is not changed (Figure 12). As the choice of the final point in the fitting at higher  $Q$  can strongly affect the estimation of the smaller pores of the pore size distributions, we choose to fit each curve to the point 70 to have a consistent comparison. Some of the data at higher  $Q$  than point 70 may be real, but these will be neglected to achieve consistency of analysis from the different stages of the experiment (see Section 3.1 in the main text).

### ***S3.2. Stage II Dry Consolidation***

Stage II is compression is ~39 psig axial load on the hydraulic piston (or  $7.74 \times 39$  psig to obtain the load on the clay itself). The Unified Fit model requires one level only. The pore filling fluid is assumed to be 100% nitrogen to represent air and at 1 atm (14.67 psia). The scattering length densities and scattering contrast for the clay and nitrogen is given in Table 1. Figure S13 presents the Unified Fit parameters and results. Figure S14 presents the pore size distribution. For comparison, a scattering contrast between clay and vacuum ( $10.753 \times 10^{20} \text{ cm}^{-4}$ ) results in relative differences for the size volume distribution from the clay-N<sub>2</sub> case by ~0.4% or less. Based on the strain of the titanium oedometer experiment, the aspect ratio of an oblate of 1.144 may represent the shape of the pores better than a sphere. Figure 15 plots the spherical versus oblate spheroid (at 1.144 aspect ratio) pore volume distributions for Stage II, illustrating that the two curves are very similar.

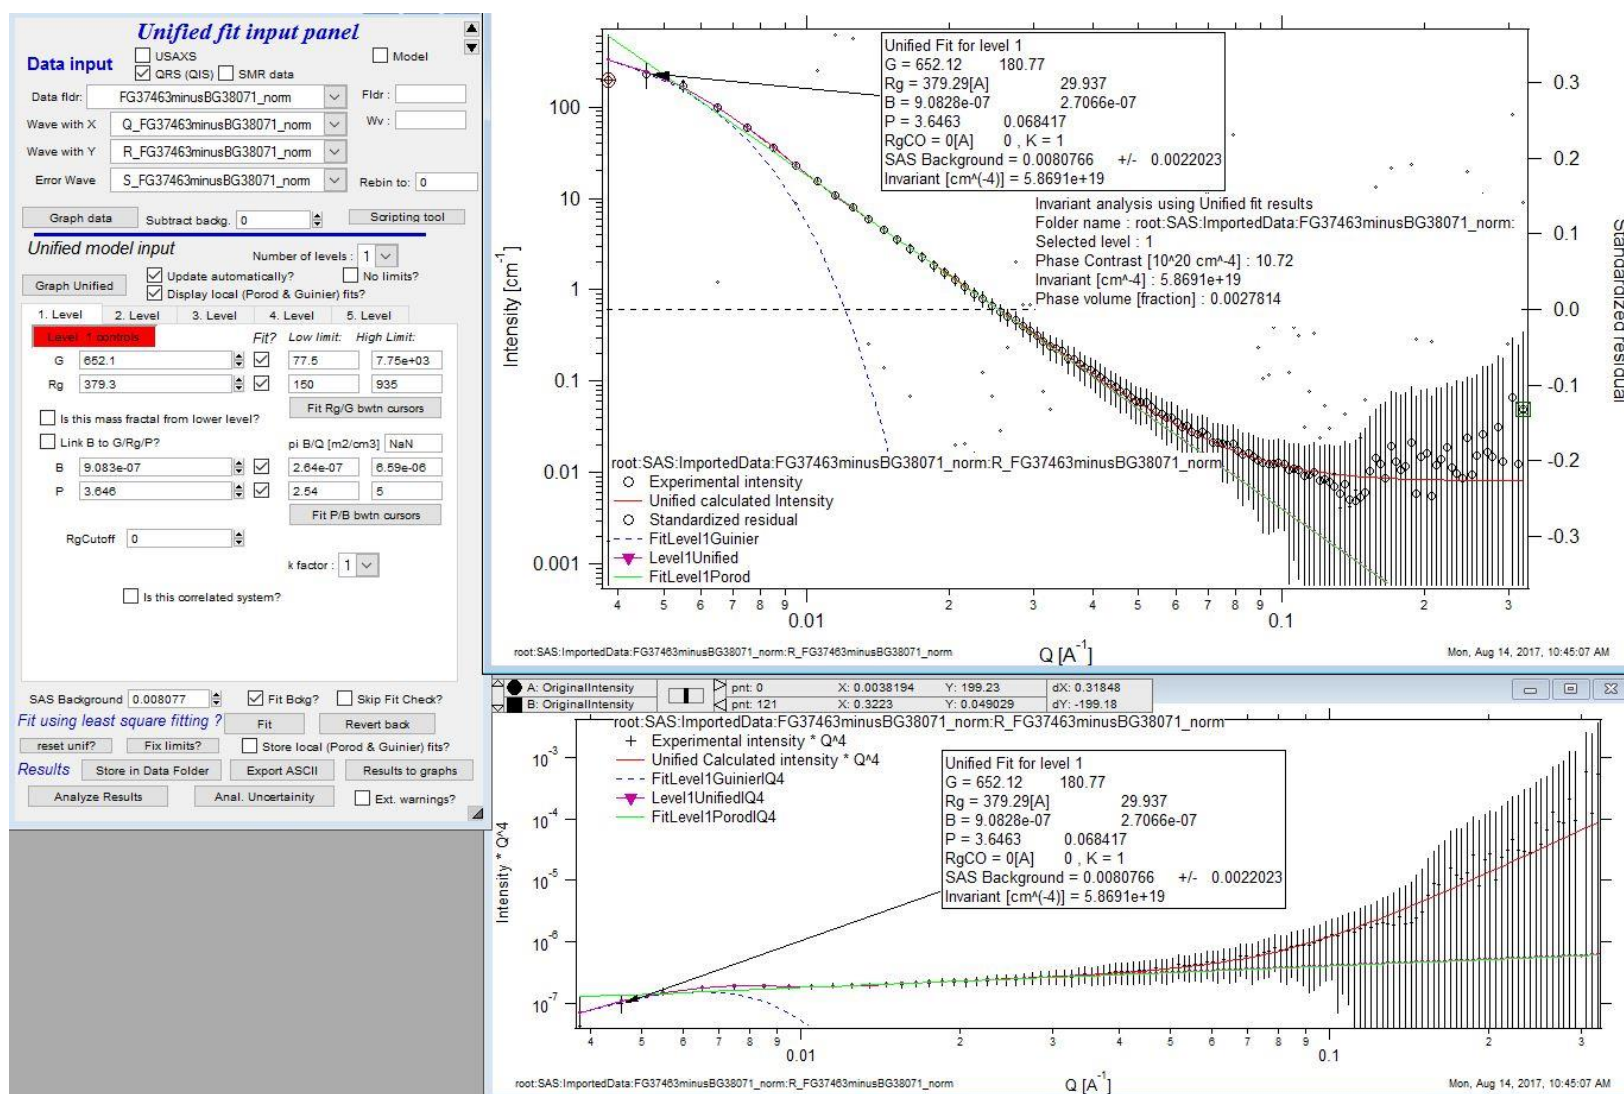

**Figure S9.** Screenshot of Unified Fit parameters and results for Stage I (sample ID 37463). Note that the correct scattering contrast was used in the fitting.



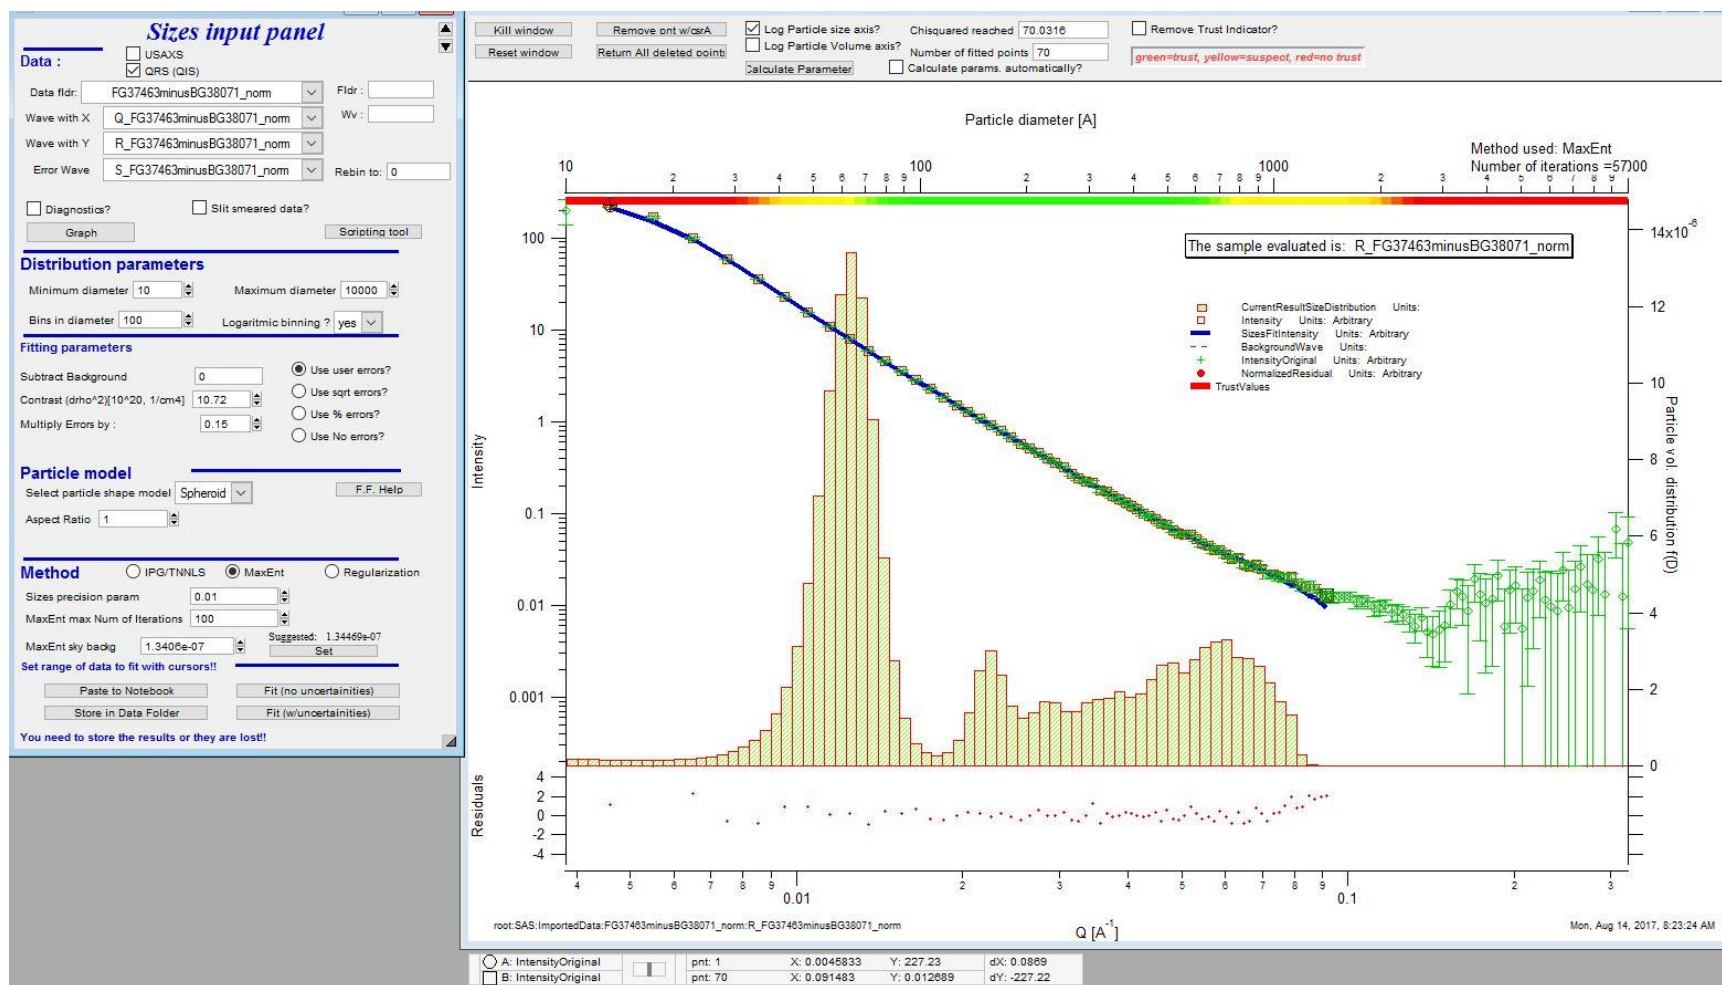

**Figure S10.** Screenshot of Pore Size Distribution parameters and results for Stage I (sample ID 37463).

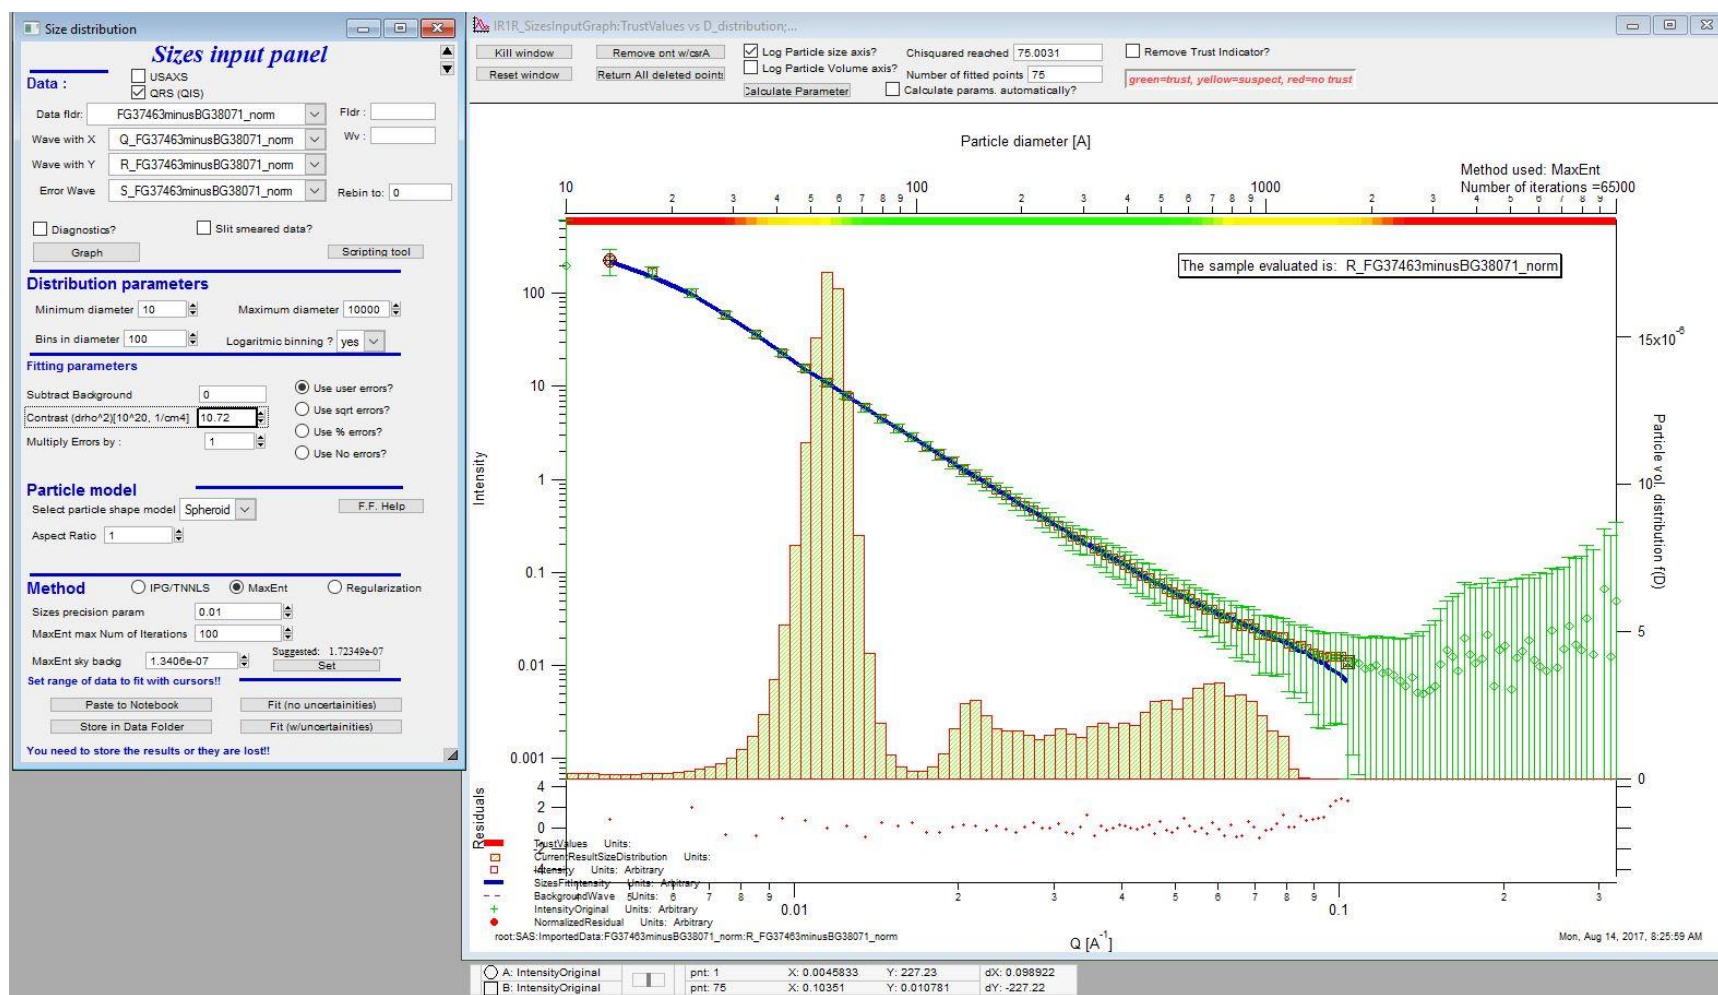

**Figure S11.** Screenshot of Pore Size Distribution parameters of Figure S10, but fit to point 75 (not point 70). Also, the “Multiply Errors by” is set to one to show the plotting of the full error bars (although the value of 0.15 was used in fitting the data).

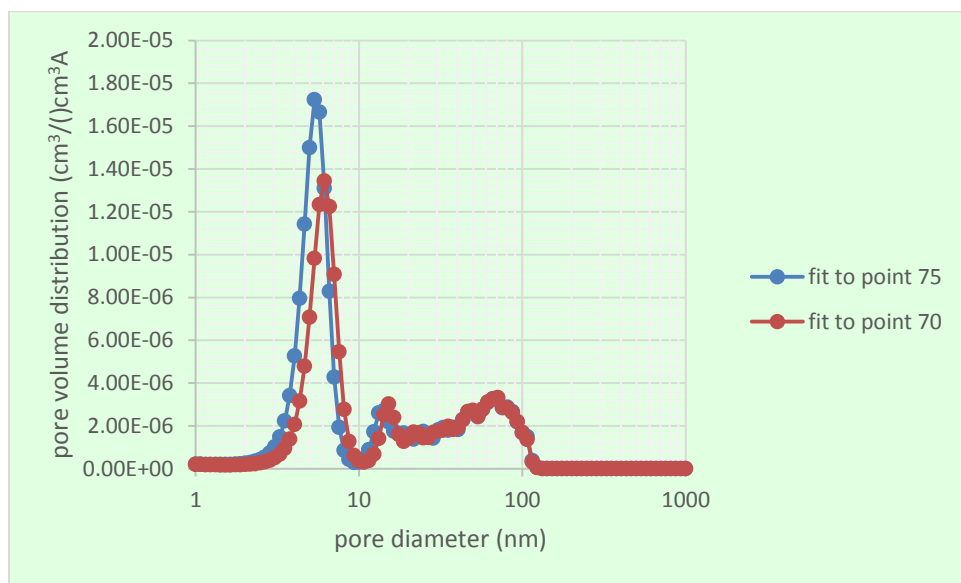

**Figure S12.** Pore volume distributions for the data set of Stage I, with curves fit to point 70 and point 75.

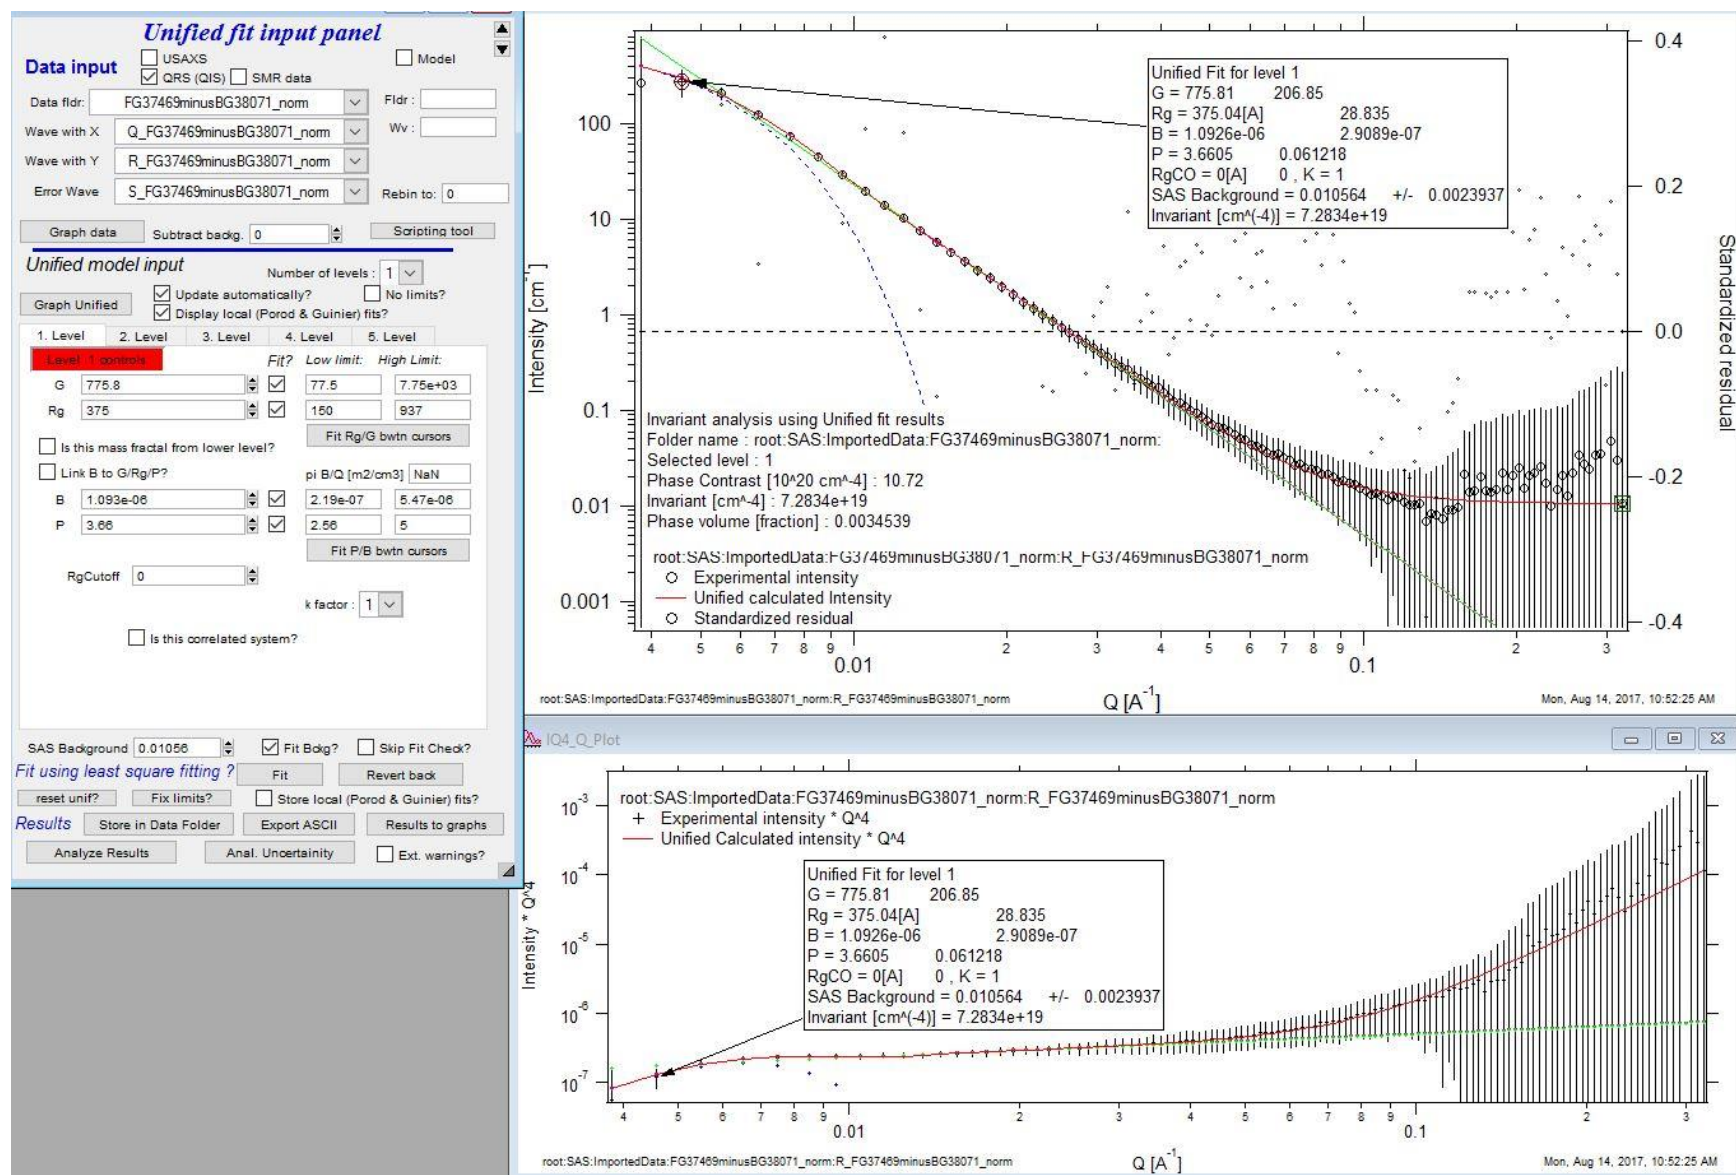

**Figure S13.** Screenshot of Unified Fit parameters and results for Stage II (sample ID 37469).



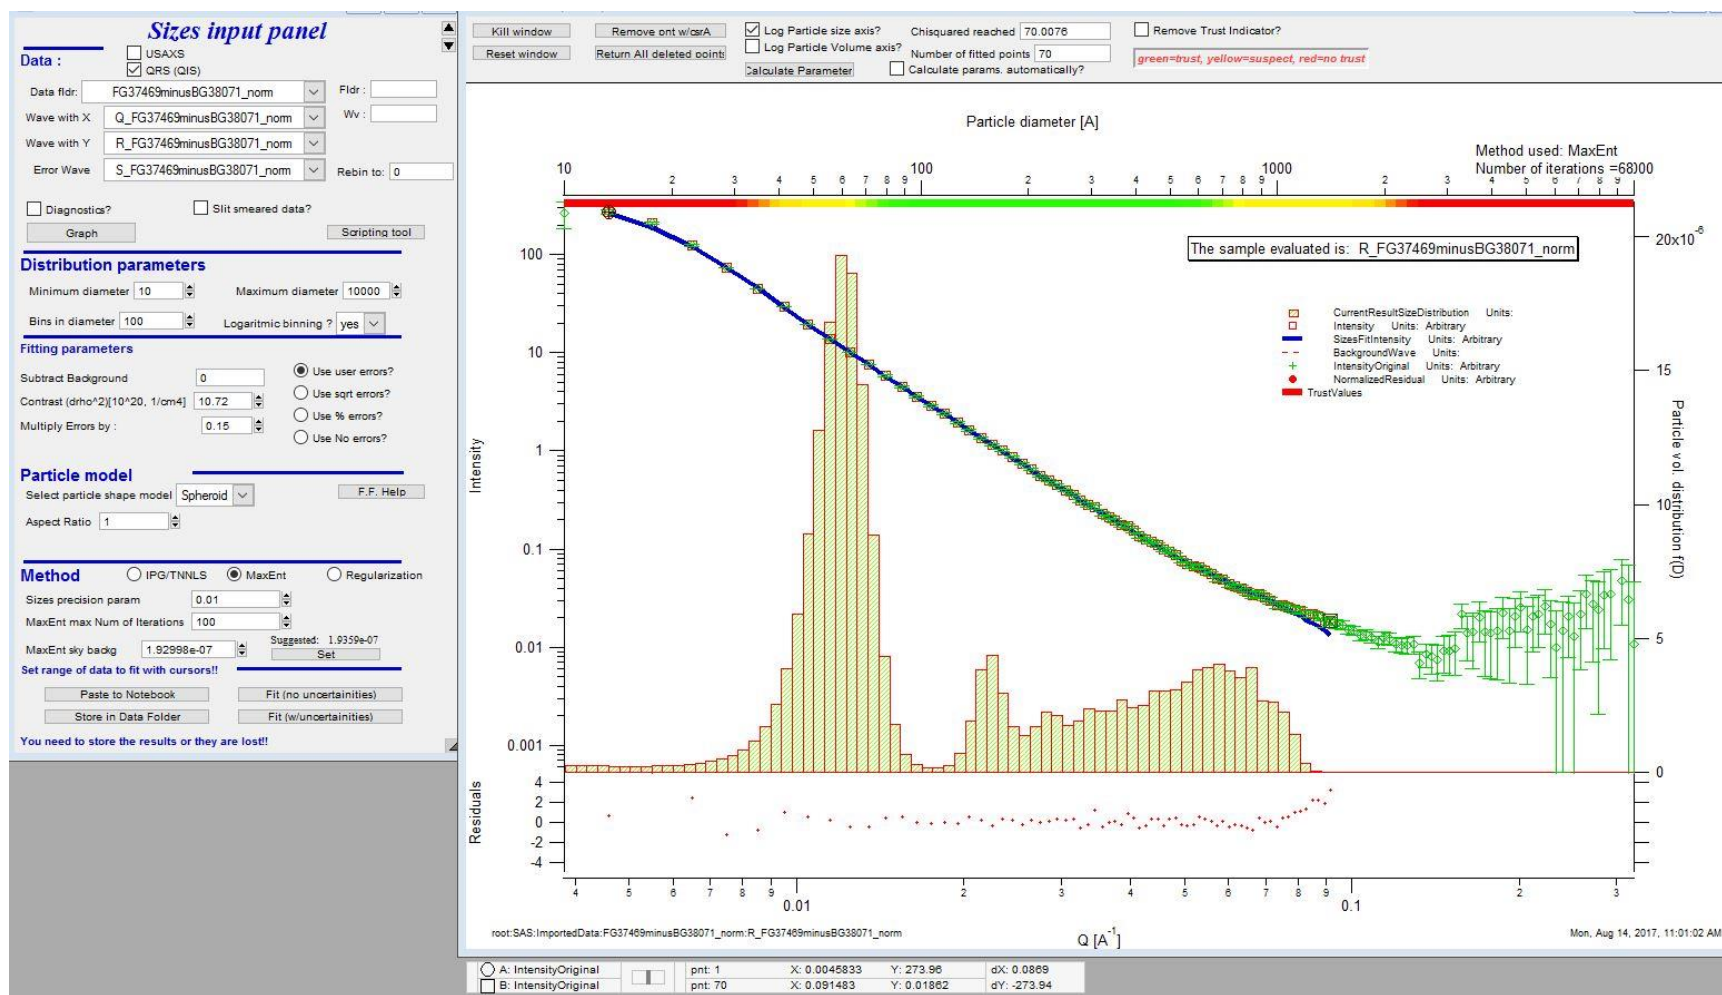

**Figure S14.** Screenshot of Pore Size Distribution parameters and results for Stage II (sample ID 37469), fit to point 70.

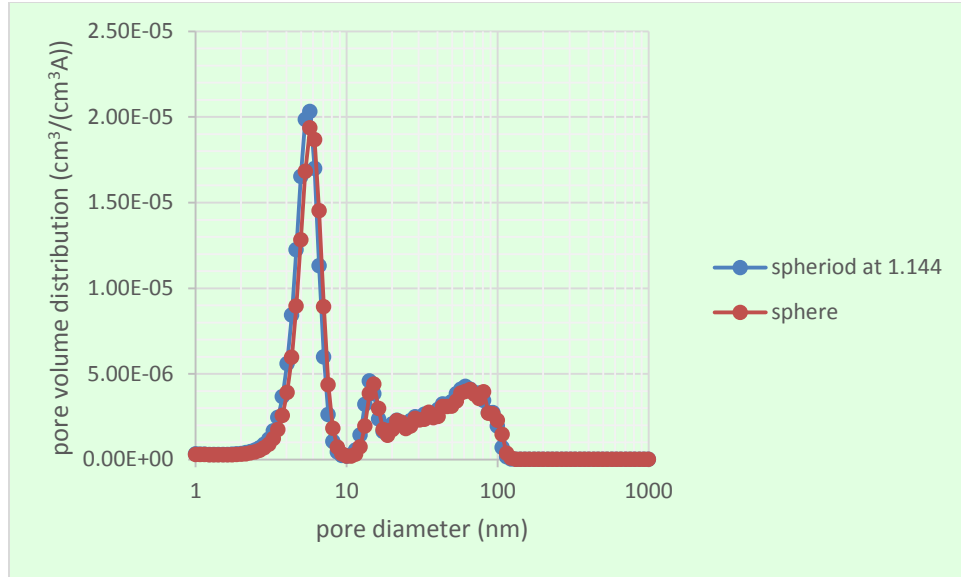

**Figure S15.** Pore volume distribution for Stage II modeled with spherical pore shapes versus oblate spheroid pore shapes at 1.144 aspect ratio.

### ***S3.3. Stage III Hydrostatic Pressurization with Dry CO<sub>2</sub>***

Stage III compression is with dry CO<sub>2</sub> at pore pressure of approximately ~930 psig. Assuming dry pure CO<sub>2</sub> at a density of 0.817 g/cm<sup>3</sup> (at a temperature of 18°C), the scattering contrast with the bentonite clay is  $1.535 \times 10^{20} \text{ cm}^{-4}$ . Figure S16 presents the Unified Fit results. Figure S17 gives the pore volume distribution for Stage III. Figure S18 illustrates that the sphere versus spheroid at aspect ratio of 1.123 pore shape (as based on the titanium experiment and the amount of strain) results in little change to the pore size distribution.

### ***S3.4. Stage IV Post-Dry CO<sub>2</sub> Consolidation***

Stage IV compression decreases the pore pressure to approximately 1 atm or ~ 0 psig (assuming 14.70 psia). The valve was closed after depressurizing to kept any sorbed or free CO<sub>2</sub> in the sample and from exchanging with atmospheric gases. Assuming dry pure CO<sub>2</sub> at a density of 1.85 g/cm<sup>3</sup> (at a temperature of 18°C), the scattering contrast with the bentonite clay is

$1.535 \times 10^{20} \text{ cm}^{-4}$ . Figure S19 presents the Unified Fit model results. Figure S20 gives the pore volume distribution for Stage III. Figure S21 illustrates that the sphere versus spheroid at aspect ratio of 1.202 pore shape (as based on the titanium experiment and the amount of strain) results in little change to the pore size distribution.

### ***S3.5. Stage V Hydrostatic Pressurization with Wet CO<sub>2</sub>***

Stage V involved increasing the pore pressure to approximately 836 psig with wet CO<sub>2</sub>; that is, CO<sub>2</sub> saturated with D<sub>2</sub>O. The mass fraction of water (H<sub>2</sub>O) dissolved in CO<sub>2</sub> at 836 psi is 0.001049 ( $Y_{\text{H}_2\text{Og}}$ ; see Section S.4.8). We assume that the dissolution of D<sub>2</sub>O in CO<sub>2</sub> is similar to H<sub>2</sub>O dissolved in CO<sub>2</sub>—at the time of these calculations, we do not have an estimate of D<sub>2</sub>O dissolution in CO<sub>2</sub>. We use the Scattering Contrast tool in Irena to obtain the scattering contrast of water-saturated CO<sub>2</sub>. The Scattering Contrast tool inputs integer values of stoichiometric coefficients; thus, the formula we use to represent  $Y_{\text{H}_2\text{Og}}$  at 0.001049 in the tool is C998951O1997902D2098O1049. The scattering contrast of the wet CO<sub>2</sub> and the SWy-2 clay is  $1.635 \times 10^{20} \text{ cm}^{-4}$ , which assumes a density of 800.81 kg/m<sup>3</sup> (at a temperature of 18°C and a pressure of 836 psi—see Section S.4.8). Figure S22 presents the Unified Fit model parameters and results. Figure S23 gives the pore volume distribution for Stage V. Figure S24 illustrates that the sphere versus spheroid at aspect ratio of 1.207 pore shape (as based on the titanium experiment and the amount of strain) results in little change to the pore size distribution.

### ***S3.6. Stage VI Post-Wet CO<sub>2</sub> Consolidation***

Stage VI is the change from high pressure wet CO<sub>2</sub> to low pressure wet CO<sub>2</sub> by opening the port to the pore fluid and allowing it to depressurize. After depressurization, the valve was closed to keep atmospheric gases from exchanging with possibly sorbed CO<sub>2</sub> and water or the wet CO<sub>2</sub> in the pores. The pore pressure when placed in the beam was approximately 3 psig. Using approximately atmospheric pressure (14.7 psia), the density of wet CO<sub>2</sub> of 0.18531 kg/m<sup>3</sup>, and

the mass fraction of 0.0084921 of H<sub>2</sub>O in CO<sub>2</sub> at 18°C (see Section S.4.8), we obtain a scattering contrast of  $10.72 \times 10^{20} \text{ cm}^{-4}$  using the Scattering Contrast tool of Irena. The Scattering Contrast tool inputs integer values of stoichiometric coefficients; thus, the formula we use to represent Y<sub>H<sub>2</sub>Og</sub> at 0.0084921 in the tool is C9915079O19830158D169842O84921. Figure S25 presents the Unified Fit model parameters and results. Figure S26 gives the pore volume distribution for Stage VI. Figure S27 presents the pore size distribution as based on the sphere versus spheroid at aspect ratio of 1.461 pore shape (as based on the titanium experiment and the amount of strain). The pore size distribution results have the greatest change for sphere versus spheroid as compared to the other experiments stages.



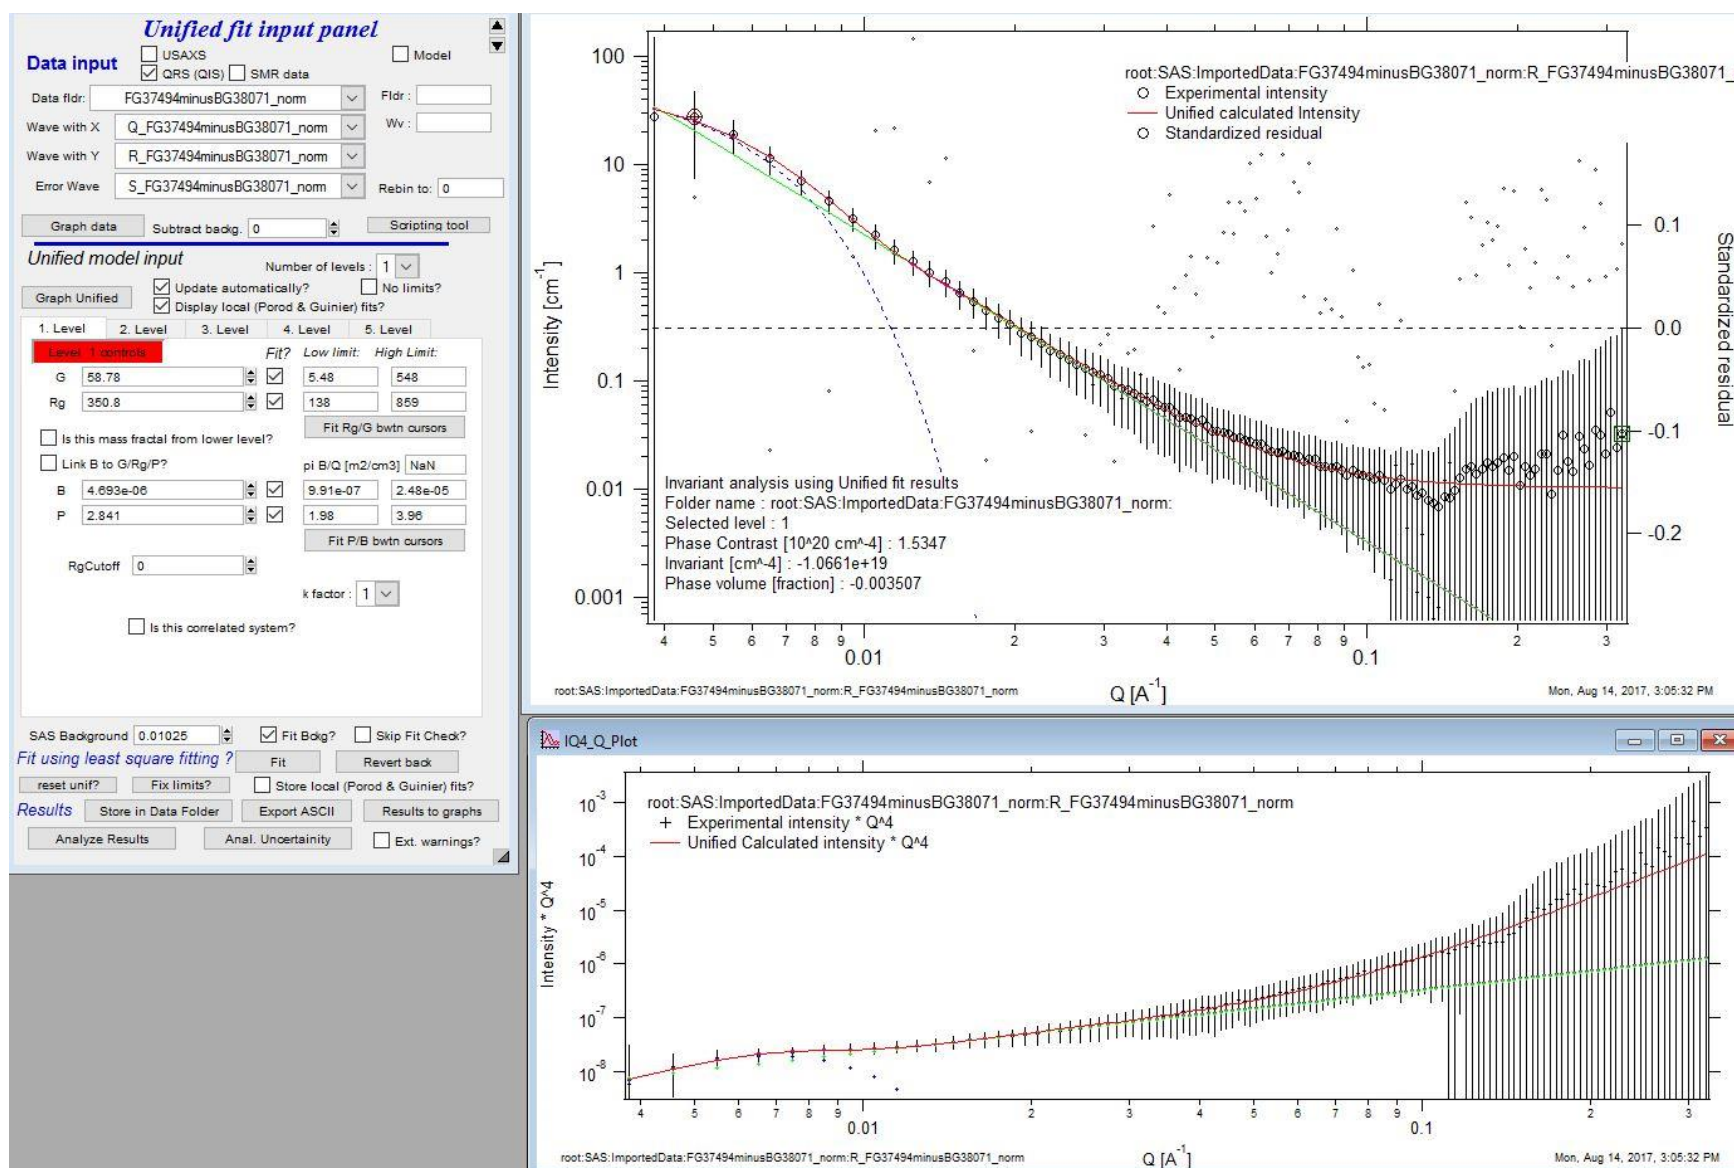

**Figure S16.** Screenshot of Unified Fit parameters and results for Stage III (sample ID 37494).



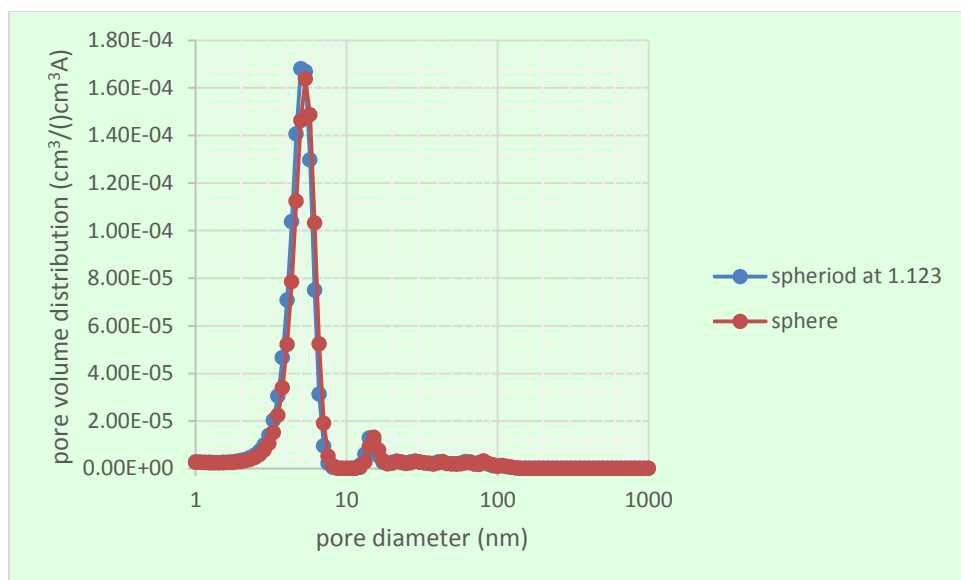

**Figure S18.** Pore volume distribution for Stage III modeled with spherical pore shapes versus oblate spheroid pore shapes at 1.123 aspect ratio.

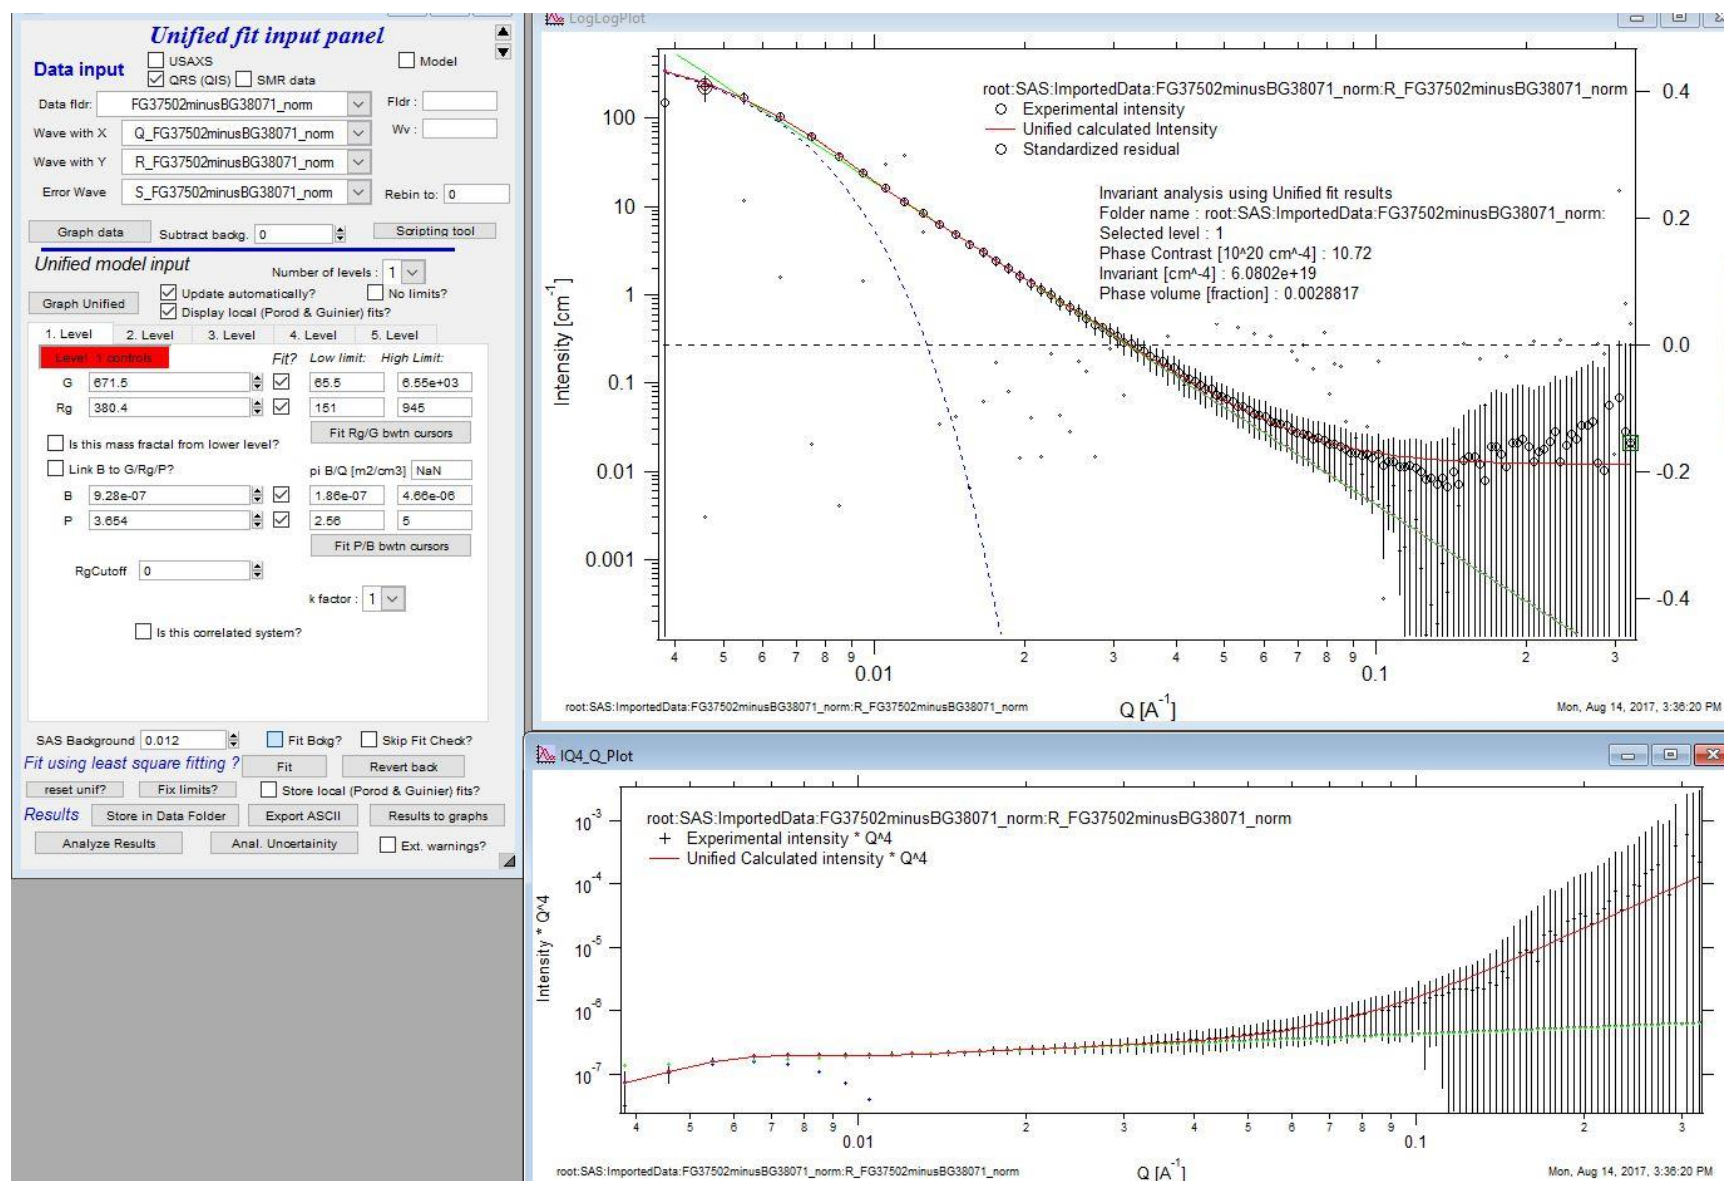

**Figure S19.** Screenshot of Unified Fit parameters and results for Stage IV (sample ID 37502).



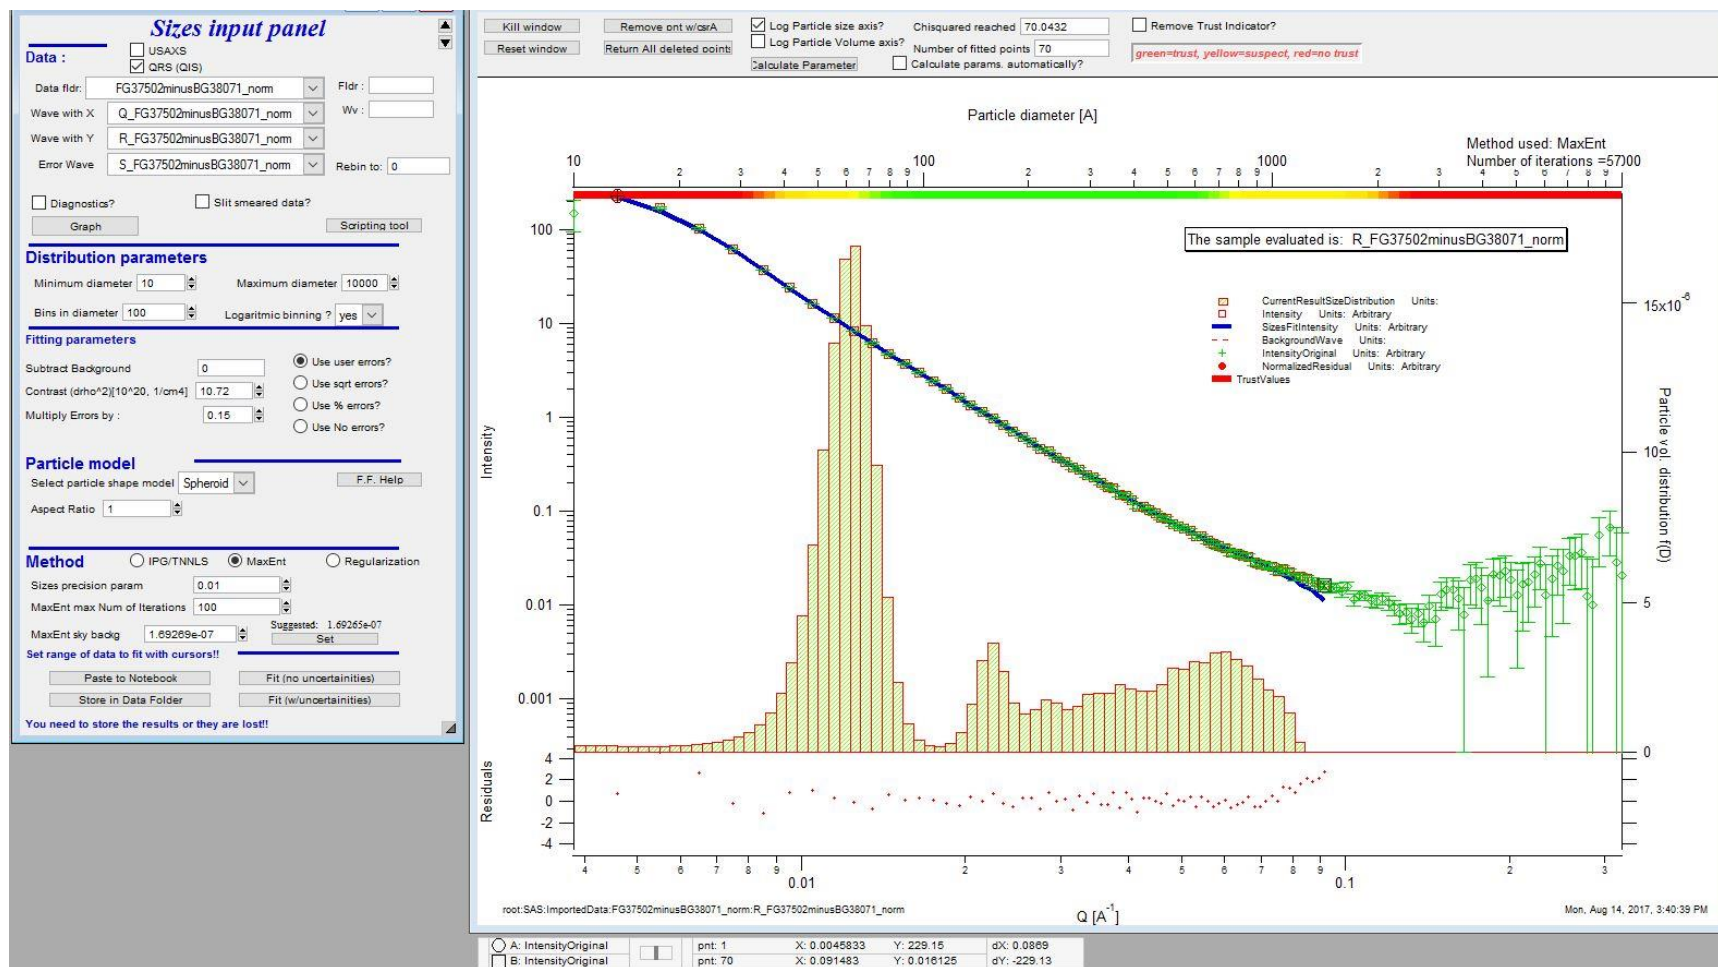

**Figure S20.** Screenshot of Pore Size Distribution parameters and results for Stage IV (sample ID 37502), fit to point 70.

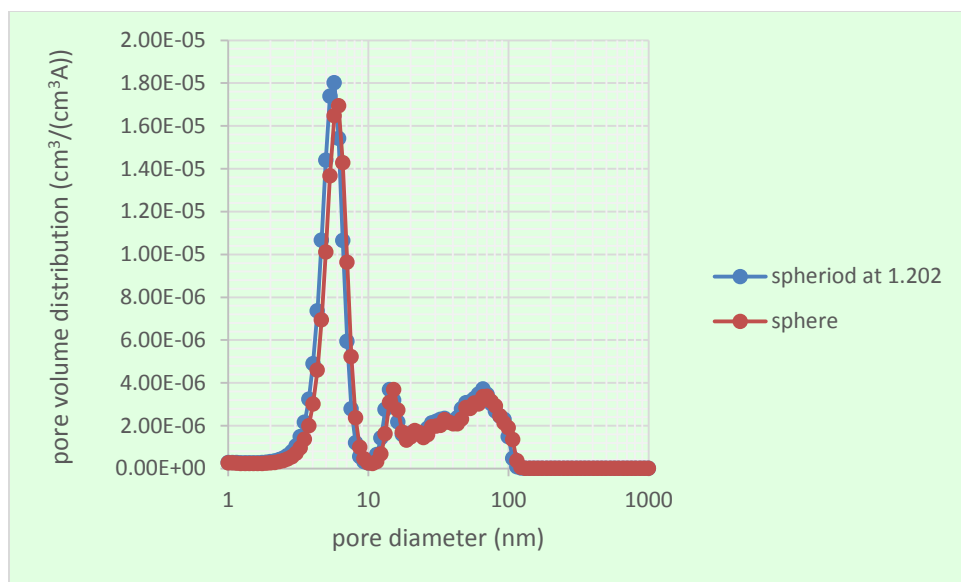

**Figure S21.** Pore volume distribution for Stage IV modeled with spherical pore shapes versus oblate spheroid pore shapes at 1.202 aspect ratio.

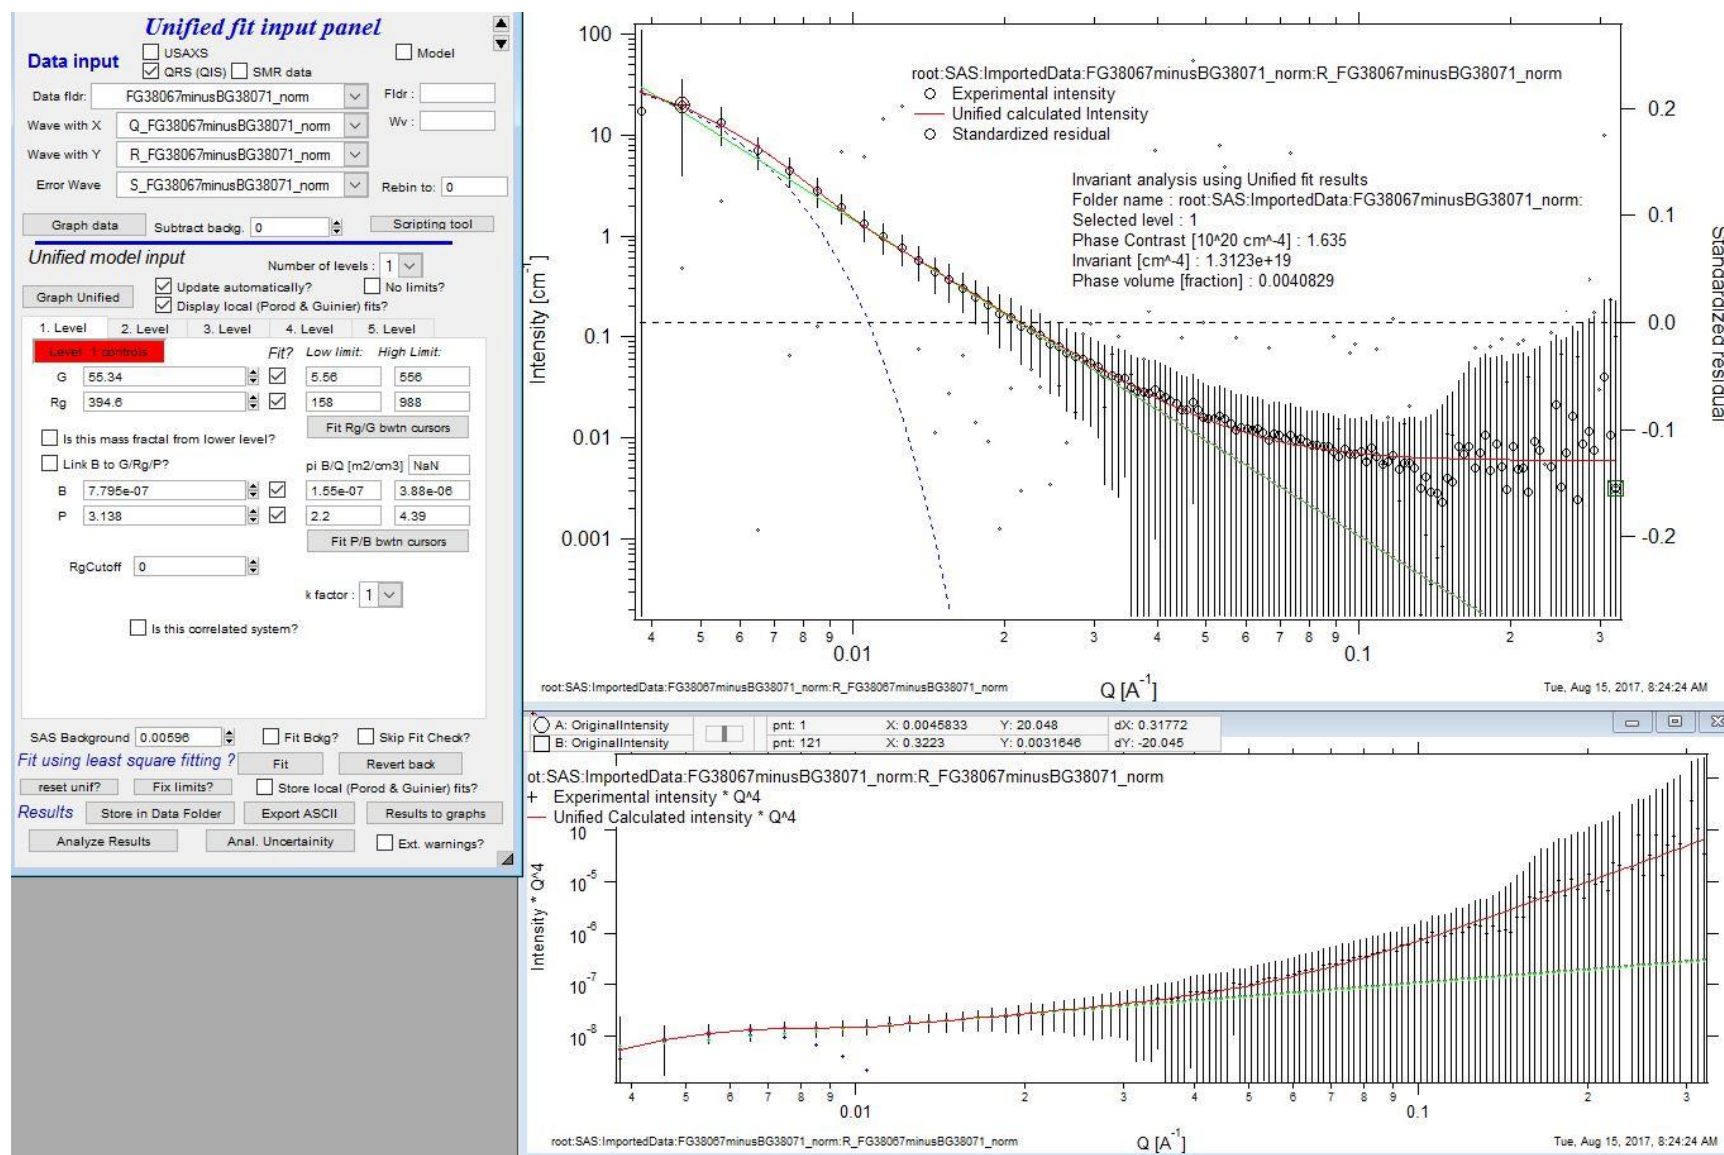

**Figure S22.** Screenshot of Unified Fit parameters and results for Stage V (sample ID 38067).

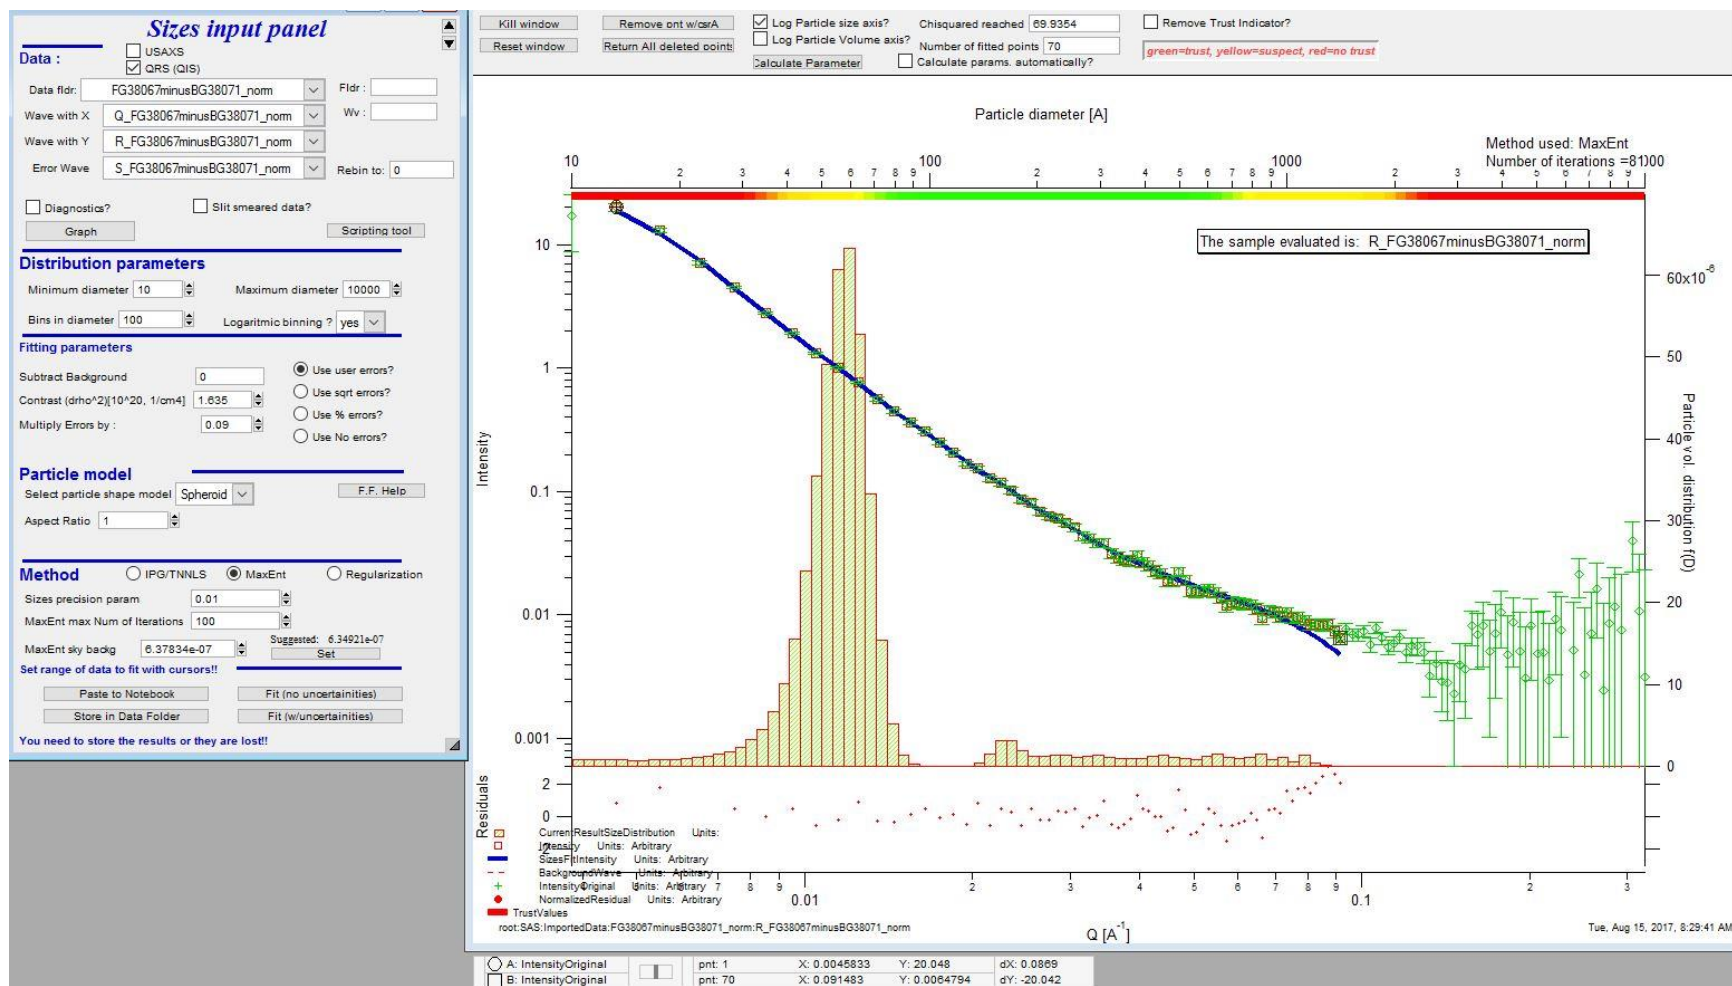

**Figure S23.** Screenshot of Pore Size Distribution parameters and results for Stage V (sample ID 38067), fit to point 70.



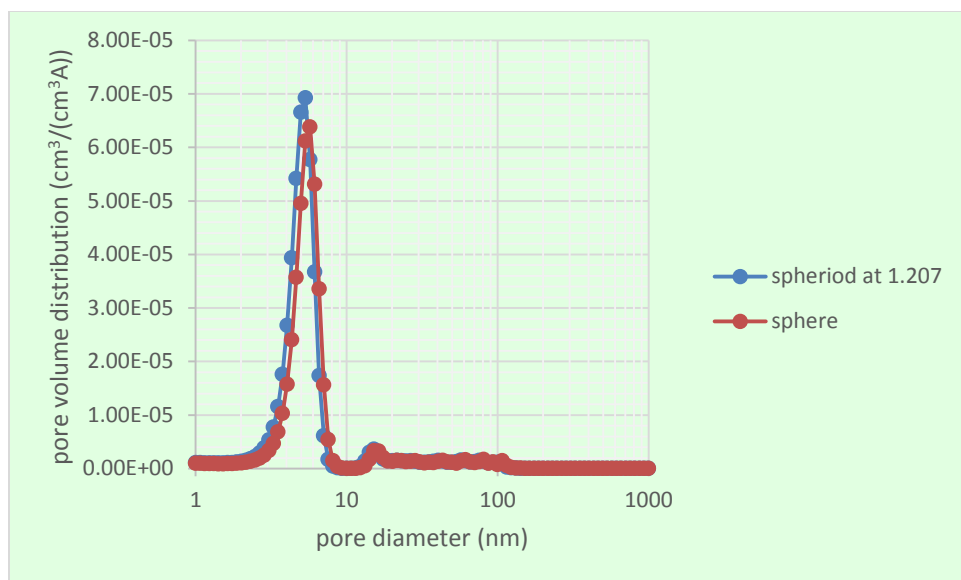

**Figure S24.** Pore volume distribution for Stage V modeled with spherical pore shapes versus oblate spheroid pore shapes at 1.207 aspect ratio.

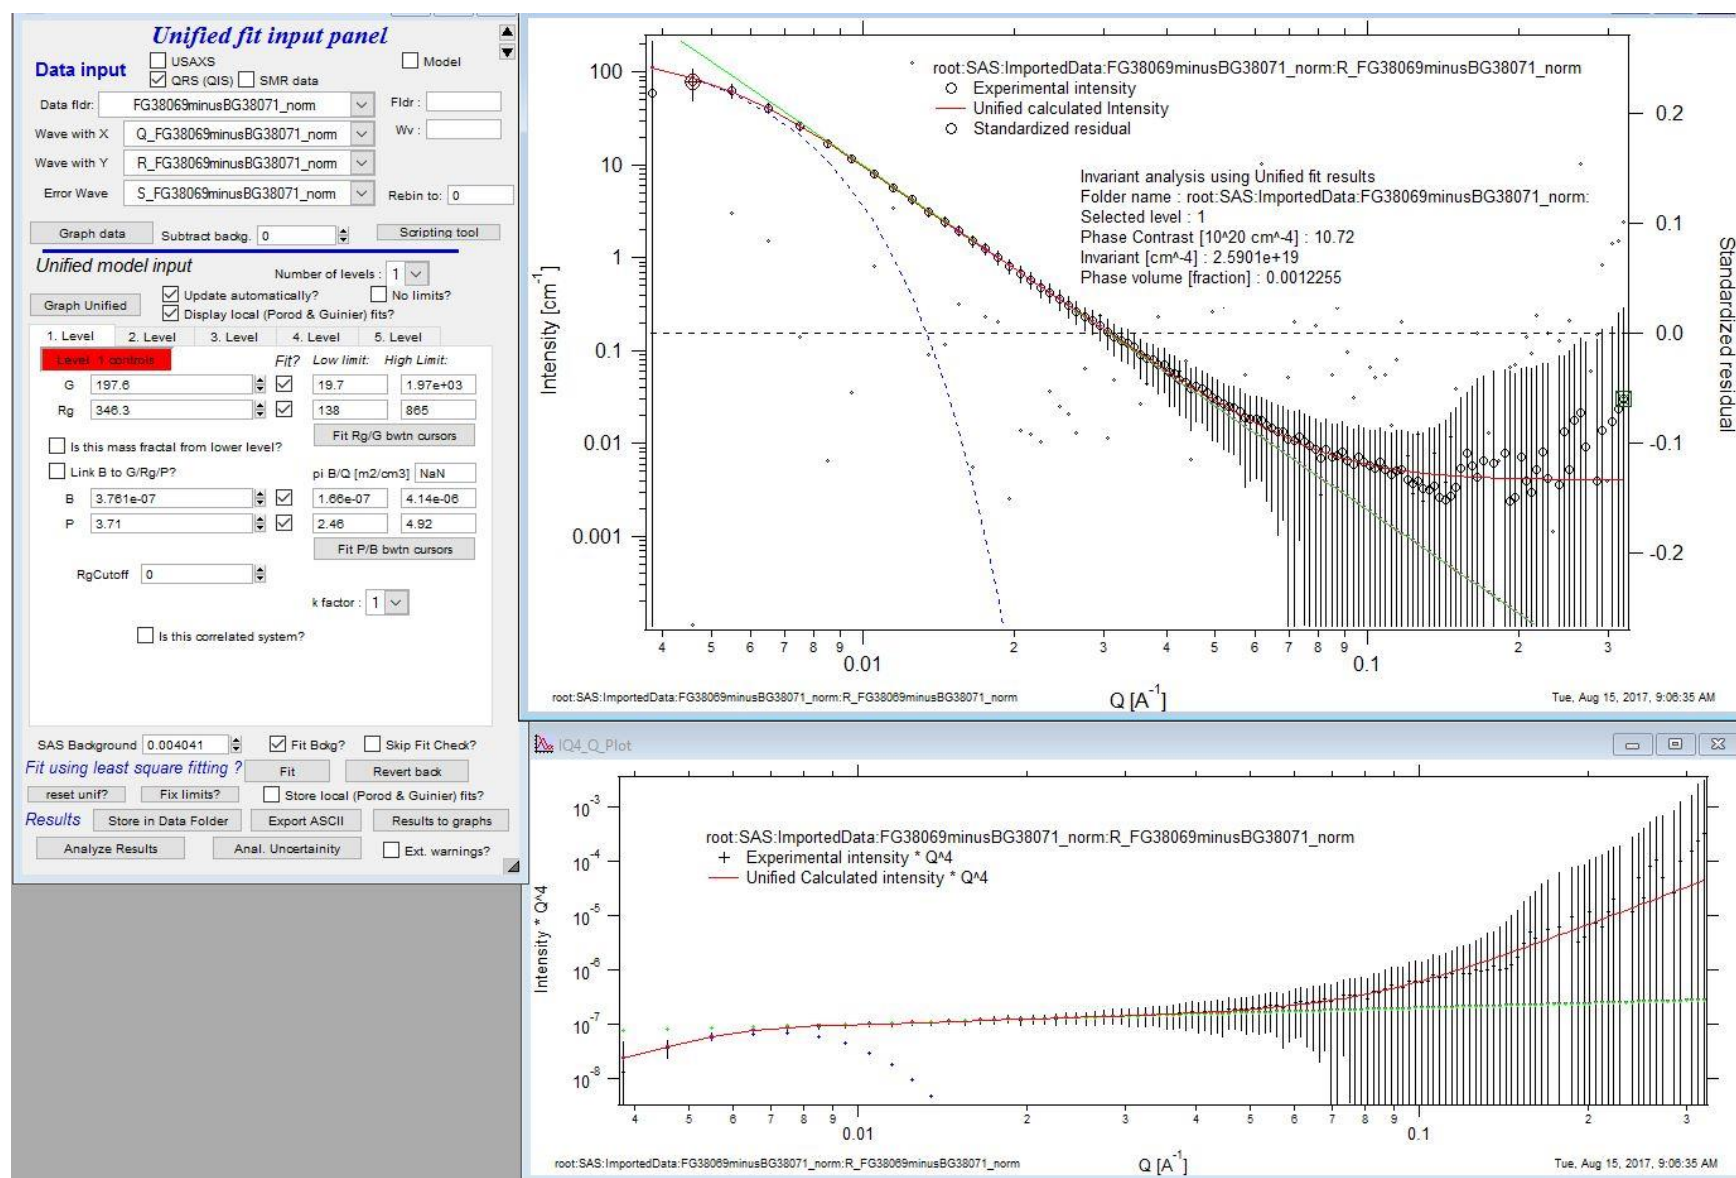

**Figure S25.** Screenshot of Unified Fit parameters and results for Stage VI (sample ID 38069).

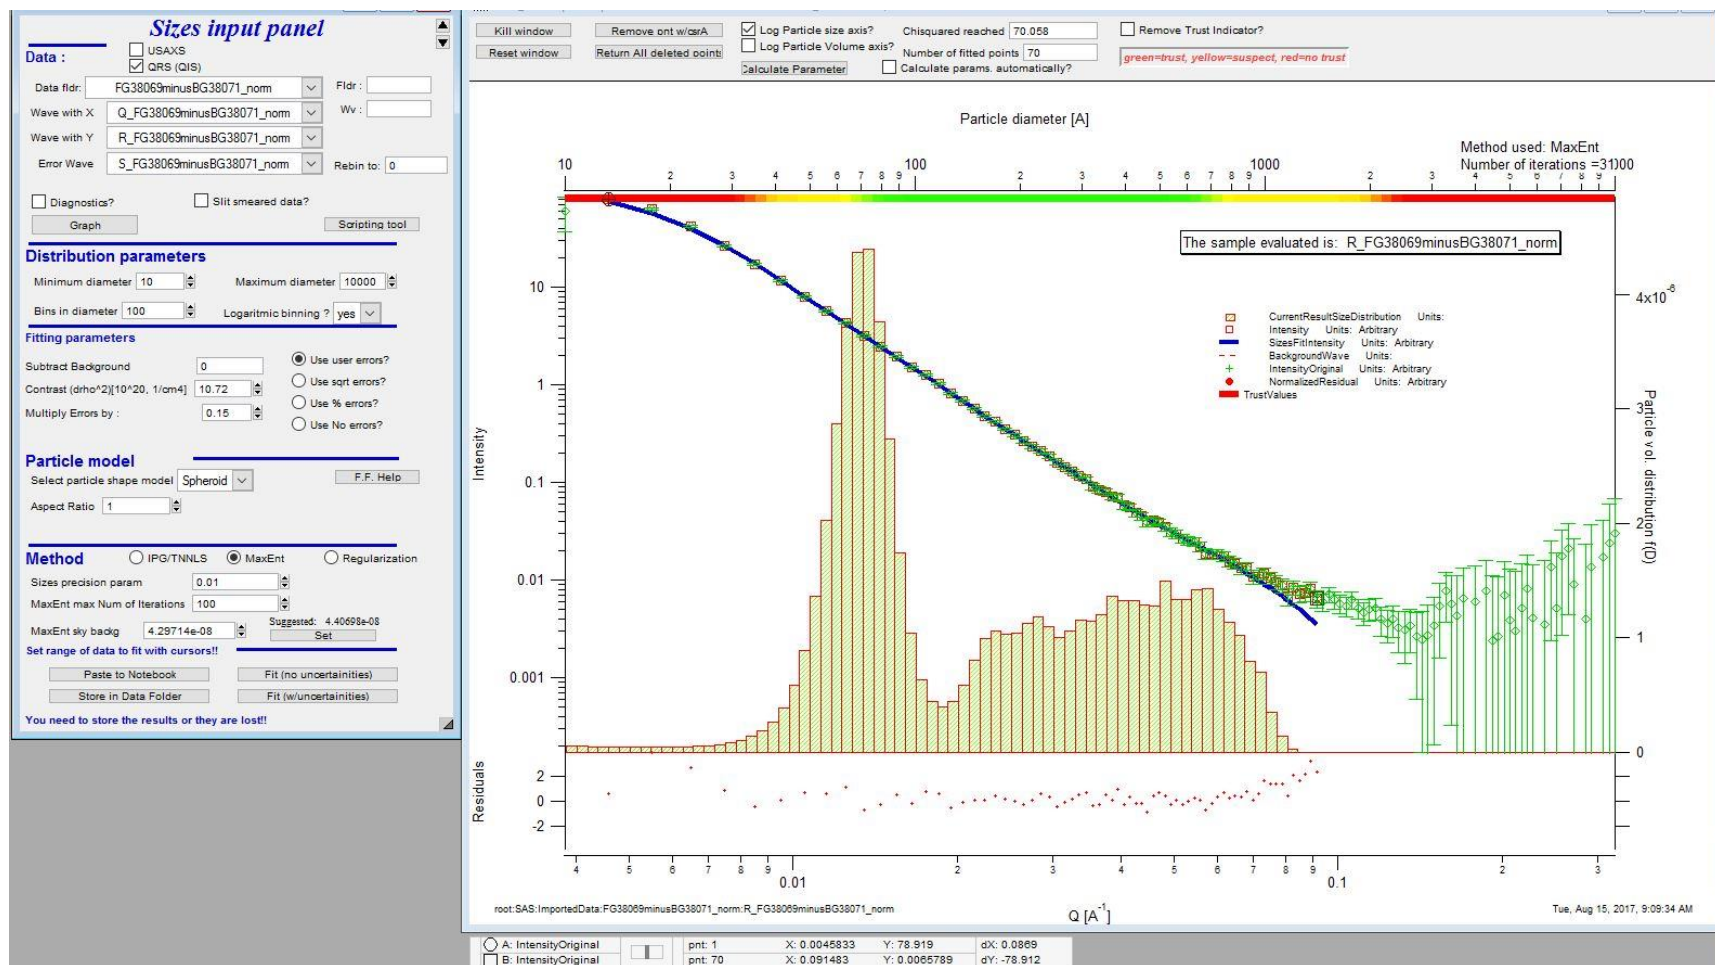

**Figure S26.** Screenshot of Pore Size Distribution parameters and results for Stage VI (sample ID 38069), fit to point 70.

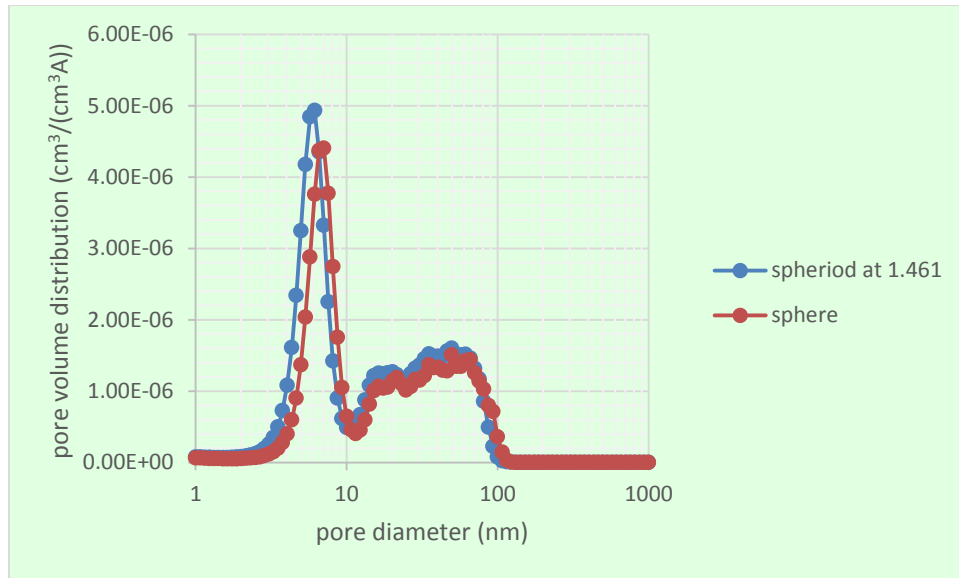

**Figure S27.** Pore volume distribution for Stage VI modeled with spherical pore shapes versus oblate spheroid pore shapes at 1.461 aspect ratio.

### ***S3.7. Sensitivity of Pore Size Distribution Interpretations to Scattering Contrast.***

We assumed in the wet CO<sub>2</sub> stages V and VI that D<sub>2</sub>O was dissolved in the CO<sub>2</sub> at saturation. It is possible that the process of flowing wet CO<sub>2</sub> through the sample allowed adsorption or capillary condensation of liquid water in pores. Thus, to assess potential effects of liquid water, we rerun the pore size distributions of Stage V and VI with scattering contrast of  $9.582 \times 10^{20} \text{ cm}^{-4}$ , which is that of the clay and D<sub>2</sub>O at standard atmospheric pressure and temperature (with density of  $1.107 \text{ g/cm}^3$ ). This is a first approximation to see how the pore size distribution would change as interpreted with fully-D<sub>2</sub>O saturated pores. Figure S28 (assuming spherical pores) indicates that the height of the peak is greatly increased in the case of liquid D<sub>2</sub>O in pores versus D<sub>2</sub>O dissolved to saturation in the pores. Figure S29 shows that the liquid D<sub>2</sub>O assume for Stage V results in little change in the pore size distribution. The high-pressure CO<sub>2</sub> stages of III and V, for dry and wet CO<sub>2</sub>, have similar scattering contrast values of  $1.54$  and  $1.64 \times 10^{20} \text{ cm}^{-4}$ , due to

the small amount of D<sub>2</sub>O that can dissolved in dry and liquid CO<sub>2</sub>. Assuming fully saturated pores with D<sub>2</sub>O instead of high pressure CO<sub>2</sub> gives much different scattering contrast of  $9.582 \times 10^{20} \text{ cm}^{-4}$ , which in turn causes a large difference in the pore size distribution (Figure S28). However, for low pressure, the dry and wet CO<sub>2</sub> scattering contrast values are more similar to that of liquid D<sub>2</sub>O, with values of  $\sim 10.72$  versus  $9.58 \times 10^{20} \text{ cm}^{-4}$ , respectively. Thus, the low pressure dry and wet CO<sub>2</sub> cases do not show a large difference from the case of liquid D<sub>2</sub>O in pores (Figure S29).

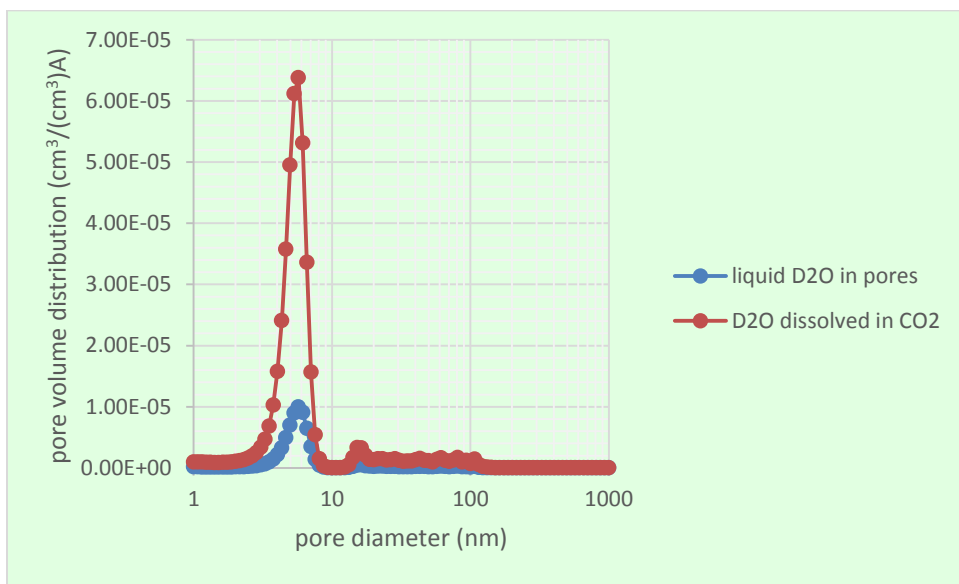

**Figure S28.** For Stage V, pore size distribution replotted assuming a scattering contrast of liquid D<sub>2</sub>O and clay versus a scattering contrast of D<sub>2</sub>O dissolved in CO<sub>2</sub> at the temperature and pressure of Stage V.

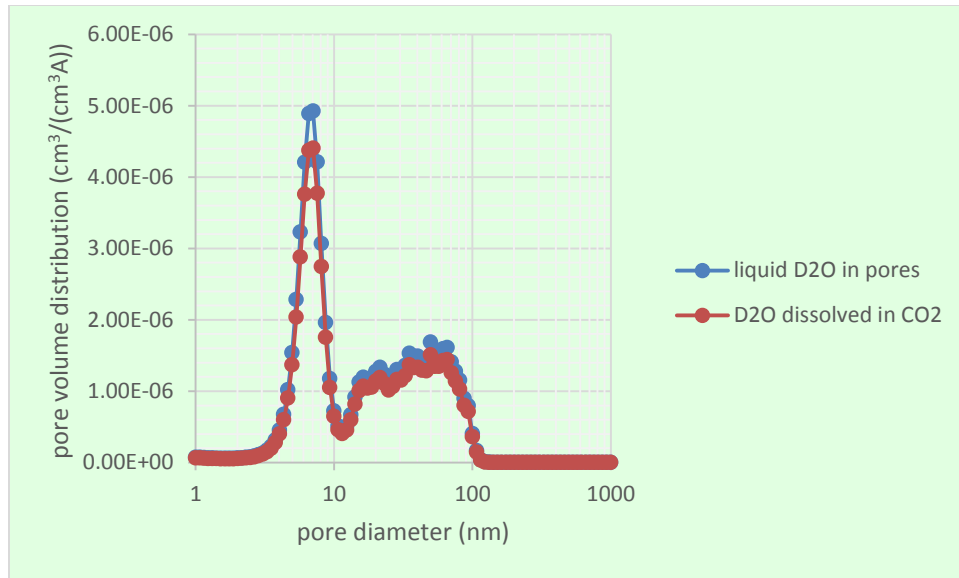

**Figure S29.** For Stage VI, pore size distribution replotted assuming a scattering contrast of liquid D<sub>2</sub>O and clay versus a scattering contrast of D<sub>2</sub>O dissolved in CO<sub>2</sub> at the temperature and pressure of Stage V.

#### **S4. TOUGH2 Calculations of Water Saturation and Liquid CO<sub>2</sub> Density, and Calculations of Scattering Contrast**

Calculations of scattering contrast require the density of dry and wet CO<sub>2</sub> and the amount of dissolved water in CO<sub>2</sub> at the various pressures and the temperature of 18°C. The density of liquid CO<sub>2</sub> at water saturation values at various pressure was obtained using an equation of state for CO<sub>2</sub> as implemented in TOUGH2 (Pruess, 2005). Figure S30 presents the range in TOUGH2-calculated density and saturation of water in CO<sub>2</sub> for the pressure encountered in this study. This can be used to estimate the volume of water available for clay swelling observed in moving from stage IV to stage V in both OSC and TIOC experiments. The mass fraction of water dissolved in liquid CO<sub>2</sub> at the conditions of stage V are seen to be 0.001 kg<sub>H<sub>2</sub>O</sub>/kg<sub>CO<sub>2</sub></sub>. (Figure S30). All this water scavenged into smectite interlayer regions would involve a volume of approximately 0.0083 m<sup>3</sup>H<sub>2</sub>O/m<sup>3</sup>CO<sub>2</sub>, using interlayer densities of water of 1000 kg/m<sup>3</sup> and liquid CO<sub>2</sub> of 820

kg/m<sup>3</sup>. At a void ratio at during stage V observed to be ~0.74 and a total volume of solids of 8.2 cm<sup>3</sup> for TIOC and 0.81 cm<sup>3</sup> for OSC, we calculate a total CO<sub>2</sub> volume of about 6 x 10<sup>-6</sup> m<sup>3</sup> and 0.60 x 10<sup>-6</sup> m<sup>3</sup> respectively. The associated volume of water available for swelling would be about 5x10<sup>-8</sup> m<sup>3</sup> or 5 x 10<sup>-2</sup> cm<sup>3</sup> for the TIOC test and approximately ten times less for OSC.

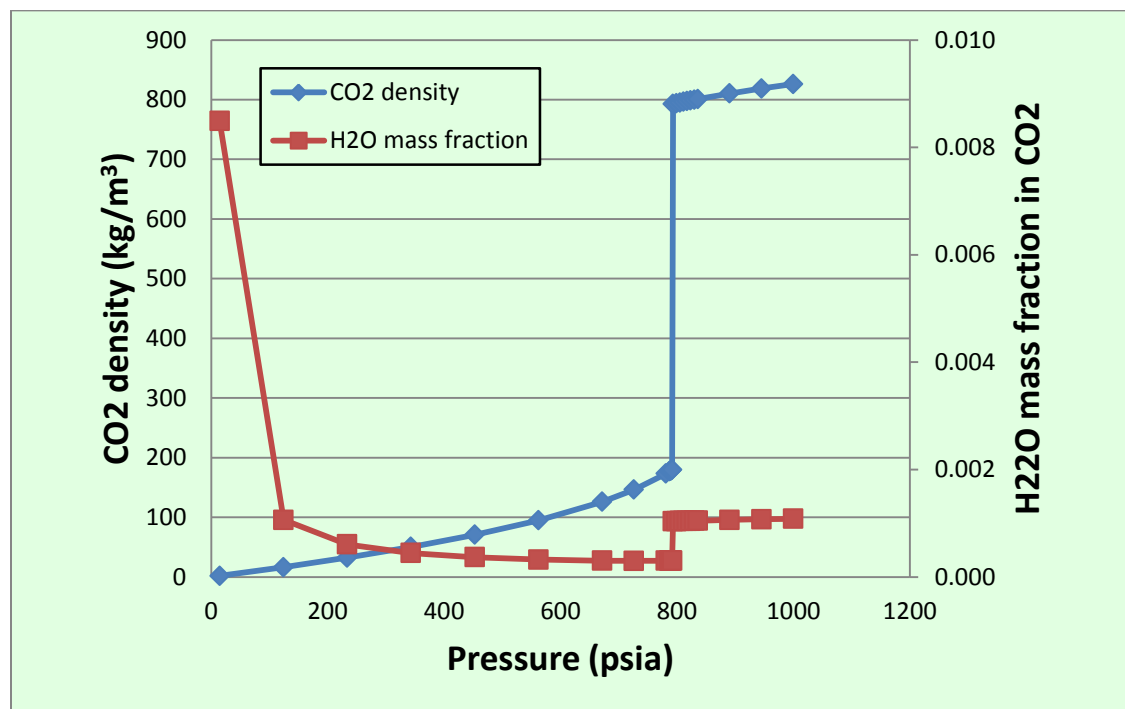

**Figure S30.** CO<sub>2</sub> density and H<sub>2</sub>O mass fraction dissolved in CO<sub>2</sub> as a function of pressure.

The Scattering Contrast Calculator macro of the Irena package was used to calculate neutron scattering length density and scattering contrast for the nitrogen (air), dry and wet CO<sub>2</sub>, and SWy-2 environments. Scattering contrast is an input to the Size Distribution macro of Irena that is used to calculate pore size distribution. The main inputs to the scattering contrast calculator are chemical formulas (with integer stoichiometric coefficients) and densities of the substances in questions. For air (nitrogen) and SWy-2, we assume densities of 0.001165 g/cm<sup>3</sup> and 2.3 g/cm<sup>3</sup>. For dry and wet CO<sub>2</sub>, we obtain densities at the relevant pressures and temperatures, including mass fractions of dissolved water in CO<sub>2</sub>, from the TOUGH2-ECO2N code (Pruess, 2005). For the wet CO<sub>2</sub> case, the stoichiometric formula was calculated to reflect the water mass fraction in CO<sub>2</sub>. Figures S1-S5 are screenshots of the scattering contrast calculator for the different SANS-oedometer stages that included pairs of SWy-2 with nitrogen and dry or wet CO<sub>2</sub>. Specific details for pressure conditions and stoichiometric formulas used for wet CO<sub>2</sub> are given in the figure captions.

**Table S4. Values of Scattering Length Density and Scattering Contrast**



## Parameters

| stage | SLD [ $10^{10} \text{ cm}^{-2}$ ] <sup>a</sup> |                |                     | $\Delta\rho^2$ [ $10^{20} \text{ cm}^{-4}$ ] <sup>b</sup> |
|-------|------------------------------------------------|----------------|---------------------|-----------------------------------------------------------|
|       | Swy-2                                          | N <sub>2</sub> | CO <sub>2</sub>     |                                                           |
| I     | 3.279                                          | 0.0047         | -                   | 10.72                                                     |
| II    | 3.279                                          | 0.0047         | -                   | 10.72                                                     |
| III   | 3.279                                          | -              | 2.04 <sup>c</sup>   | 1.54                                                      |
| IV    | 3.279                                          | -              | 0.0046 <sup>c</sup> | 10.72                                                     |
| V     | 3.279                                          | -              | 2.001 <sup>d</sup>  | 1.635                                                     |
| VI    | 3.279                                          | -              | 0.0047 <sup>d</sup> | 10.72                                                     |

<sup>a</sup>Neutron scattering length density.

<sup>b</sup>Scattering contrast.

<sup>c</sup>Dry CO<sub>2</sub>.

<sup>d</sup>Wet CO<sub>2</sub>

**Substance editor and scattering contrast calculator**

Number of elements: 11    Density [g/cm<sup>3</sup>]: 2.3    ☐ Weight fraction?

**Modify element:** 1 2 3 4 5 6 7 8 9 10 11

Element: Ca    Isotope: natural    Electrons: 20    Neu b [e-14 m]: 0.49  
 Atom wt: 40.078    Incoh b [e-14 m]: 0.06  
 Abs Xsec [e-24 cm<sup>2</sup>]: 0.46

Change element: 12

Ca<sub>12</sub> Na<sub>32</sub> K<sub>5</sub> Al<sub>303</sub> Fe<sub>41</sub> Mn    Mg<sub>54</sub> Ti<sub>2</sub> Si<sub>798</sub> O<sub>2400</sub> H<sub>400</sub>

|                                                                   |             |
|-------------------------------------------------------------------|-------------|
| Molecular weight                                                  | 74554.4     |
| Weight of 1 mol [g]                                               | 1.23800e-19 |
| Num of mol in 1cm <sup>3</sup>                                    | 1.85783e+19 |
| Number of electrons per mol                                       | 37181       |
| Number of el per 1cm <sup>3</sup>                                 | 6.90759e+23 |
| Xray scat length dens (rho) [10 <sup>10</sup> cm <sup>-2</sup> ]  | 19.46       |
| Xray SL per gram [10 <sup>10</sup> cm <sup>2</sup> /g]            | 8.463       |
| Volume of 1 mol [cm <sup>3</sup> ]                                | 5.38263e-20 |
| Total b of the molecule [cm]                                      | 1.76507e-09 |
| Neut. scat length dens (rho) [10 <sup>10</sup> cm <sup>-2</sup> ] | 3.279       |
| Neut. SLD (rho) per gram [10 <sup>10</sup> cm <sup>2</sup> /g]    | 1.426       |
| X rays delta-rho squared [10 <sup>20</sup> cm <sup>-4</sup> ]     | 378.5       |
| Neutrons delta-rho squared [10 <sup>20</sup> cm <sup>-4</sup> ]   | 10.72       |
| Ratio Xrays/Neutrons delta rho-squared                            | 35.3        |

**Saved substances:** ☐ Within this experiment (or on the computer)?

CO2 at 836 psi and clay  
 CO2D2O at 0.0010638  
 CO2D2O at 800pt81 kgpermcube  
 D2O\_atmPress  
**N2\_density\_0.001165**  
 N2\_density\_0.00117454  
 Swy-2\_combined  
 Swy-2\_notCombined

Second phase: N2\_density\_0    ☐ Use Vacuum?

X ray scatt length dens second phase (rho) [10<sup>10</sup> cm<sup>-2</sup>]: 0.0098801  
 Neutrons scatt length dens second phase (rho) [10<sup>10</sup> cm<sup>-2</sup>]: 0.004688

Anomalous calculator

Buttons: Save data, Load data, Delete data, New compound, Load as second phase

**Figure S31.** Screen shot of Scattering Contrast Calculator for SWy-2 and N<sub>2</sub>, which corresponds with Stages I and II.



### Substance editor and scattering contrast calculator

Number of elements: 11      Density [g/cm<sup>3</sup>]: 2.3      ☐ Weight fraction?

**Modify element:** 2 4 6 8 10

Element: Ca      Isotope: natural      Electrons: 20      Neu b [e-14 m]: 0.49  
 Atom wt: 40.078      Incoh b [e-14 m]: 0.06  
 Abs Xsec [e-24 cm<sup>2</sup>]: 0.46

Change element: 12

Ca<sub>12</sub> Na<sub>32</sub> K<sub>5</sub> Al<sub>303</sub> Fe<sub>41</sub> Mn Mg<sub>54</sub> Ti<sub>2</sub> Si<sub>798</sub> O<sub>2400</sub> H<sub>400</sub>

|                                                      |             |
|------------------------------------------------------|-------------|
| Molecular weight                                     | 74554.4     |
| Weight of 1 mol [g]                                  | 1.23800e-19 |
| Num of mol in 1cm <sup>3</sup>                       | 1.85783e+19 |
| Number of electrons per mol                          | 37181       |
| Number of el per 1cm <sup>3</sup>                    | 6.90759e+23 |
| Xray scat length dens (rho) [10 <sup>10</sup> cm-2]  | 19.46       |
| Xray SL per gram [10 <sup>10</sup> cm/g]             | 8.463       |
| Volume of 1 mol [cm <sup>3</sup> ]                   | 5.38263e-20 |
| Total b of the molecule [cm]                         | 1.76507e-09 |
| Neut. scat length dens (rho) [10 <sup>10</sup> cm-2] | 3.279       |
| Neut. SLD (rho) per gram [10 <sup>10</sup> cm/g]     | 1.426       |
| X rays delta-rho squared [10 <sup>20</sup> cm-4]     | 157.1       |
| Neutrons delta-rho squared [10 <sup>20</sup> cm-4]   | 1.535       |
| Ratio Xrays/Neutrons delta rho-squared               | 102.4       |

**Saved substances:** ☐ Within this experiment (or on the computer)?

CO2 at 0 point 00185 g per c  
**CO2 at 0p81685gpercc**  
 CO2 at 836 psi and 0.80152 g  
 CO2 at 836 psi and clay  
 CO2D2O at 0.0010638  
 CO2D2O at 800pt81 kgpermcube  
 D2O\_atmPress  
 N2\_density\_0.001165  
 N2\_density\_0.00117454

Second phase: CO2 at 0p81685gpercc      ☐ Use Vacuum?

X ray scat length dens second phase (rho) [10<sup>10</sup> cm-2]: 6.9293  
 Neutrons scat length dens second phase (rho) [10<sup>10</sup> cm-2]: 2.04

Anomalous calculator

**Figure S32.** Screen shot of Scattering Contrast Calculator for SWy-2 and pure CO<sub>2</sub> at a density of 0.81685 g/cm<sup>3</sup> (at the pressure of 930 psia), which corresponds with Stage III.

### Substance editor and scattering contrast calculator

Number of elements: 11      Density [g/cm<sup>3</sup>]: 2.3      ☐ Weight fraction?

**Modify element:** 2 4 6 8 10

Element: Ca      Isotope: natural      Electrons: 20      Neu b [e-14 m]: 0.49  
 Atom wt: 40.078      Incoh b [e-14 m]: 0.06  
 Abs Xsec [e-24 cm<sup>2</sup>]: 0.46

Change element: 12

Ca<sub>12</sub> Na<sub>32</sub> K<sub>5</sub> Al<sub>303</sub> Fe<sub>41</sub> Mn Mg<sub>54</sub> Ti<sub>2</sub> Si<sub>798</sub> O<sub>2400</sub> H<sub>400</sub>

|                                                      |             |
|------------------------------------------------------|-------------|
| Molecular weight                                     | 74554.4     |
| Weight of 1 mol [g]                                  | 1.23800e-19 |
| Num of mol in 1cm <sup>3</sup>                       | 1.85783e+19 |
| Number of electrons per mol                          | 37181       |
| Number of el per 1cm <sup>3</sup>                    | 6.90759e+23 |
| Xray scat length dens (rho) [10 <sup>10</sup> cm-2]  | 19.46       |
| Xray SL per gram [10 <sup>10</sup> cm/g]             | 8.463       |
| Volume of 1 mol [cm <sup>3</sup> ]                   | 5.38263e-20 |
| Total b of the molecule [cm]                         | 1.76507e-09 |
| Neut. scat length dens (rho) [10 <sup>10</sup> cm-2] | 3.279       |
| Neut. SLD (rho) per gram [10 <sup>10</sup> cm/g]     | 1.426       |
| X rays delta-rho squared [10 <sup>20</sup> cm-4]     | 378.3       |
| Neutrons delta-rho squared [10 <sup>20</sup> cm-4]   | 10.72       |
| Ratio Xrays/Neutrons delta rho-squared               | 35.28       |

**Saved substances:** ☐ Within this experiment (or on the computer)?

CO2 at 836 psi and clay  
 CO2D2O at 0.0010638  
 CO2D2O at 800pt81 kgpermcube  
**CO2pure\_Opt0018526**  
 D2O\_atmPress  
 N2\_density\_0.001165  
 N2\_density\_0.00117454  
 Swy-2\_combined  
 Swy-2\_notCombined

Second phase: CO2pure\_Opt0018526      ☐ Use Vacuum?

X ray scat length dens second phase (rho) [10<sup>10</sup> cm-2]: 0.015716  
 Neutrons scat length dens second phase (rho) [10<sup>10</sup> cm-2]: 0.004627

Anomalous calculator

**Figure S33.** Screen shot of Scattering Contrast Calculator for SWy-2 and pure CO<sub>2</sub> at a density of 0.0018526 g/cm<sup>3</sup> (at the pressure of 14.7 psia), which corresponds with Stage IV.

**Substance editor and scattering contrast calculator**

Number of elements: 11      Density [g/cm3]: 2.3      ☐ Weight fraction?

**Modify element:** 2      4      6      8      10

Element: Ca      Isotope: natural      Electrons: 20      Neu b [e-14 m]: 0.49  
 Atom wt: 40.078      Incoh b [e-14 m]: 0.06  
 Abs Xsec [e-24 cm<sup>2</sup>]: 0.46

Change element: 12

Ca<sub>12</sub> Na<sub>32</sub> K<sub>5</sub> Al<sub>303</sub> Fe<sub>41</sub> Mn Mg<sub>54</sub> Ti<sub>2</sub> Si<sub>798</sub> O<sub>2400</sub> H<sub>400</sub>

|                                                      |             |
|------------------------------------------------------|-------------|
| Molecular weight                                     | 74554.4     |
| Weight of 1 mol [g]                                  | 1.23800e-19 |
| Num of mol in 1cm3                                   | 1.85783e+19 |
| Number of electrons per mol                          | 37181       |
| Number of el per 1cm3                                | 6.90759e+23 |
| Xray scat length dens (rho) [10 <sup>10</sup> cm-2]  | 19.46       |
| Xray SL per gram [10 <sup>10</sup> cm/g]             | 8.463       |
| Volume of 1 mol [cm3]                                | 5.38263e-20 |
| Total b of the molecule [cm]                         | 1.76507e-09 |
| Neut. scat length dens (rho) [10 <sup>10</sup> cm-2] | 3.279       |
| Neut. SLD (rho) per gram [10 <sup>10</sup> cm/g]     | 1.426       |
| X rays delta-rho squared [10 <sup>20</sup> cm-4]     | 160.6       |
| Neutrons delta-rho squared [10 <sup>20</sup> cm-4]   | 1.635       |
| Ratio Xrays/Neutrons delta rho-squared               | 98.22       |

**Saved substances:** ☐ Within this experiment (or on the computer)?

CO2 at 0 point 00185 g per c  
 CO2 at 0p81685gpercc  
 CO2 at 836 psi and 0.80152 g  
 CO2 at 836 psi and clay  
 CO2D2O at 0.0010638  
**CO2D2O at 800pt81 kgpermcube**  
 D2O\_atmPress  
 N2\_density\_0.001165  
 N2\_density\_0.00117454

Second phase: CO2D2O at 800pt81 kgpermcube      ☐ Use Vacuum?

X ray scatt length dens second phase (rho) [10<sup>10</sup> cm-2]: 6.7933  
 Neutrons scatt length dens second phase (rho) [10<sup>10</sup> cm-2]: 2.001

Anomalous calculator

Save data  
 Load data  
 Delete data  
 New compound  
 Load as second phase

**Figure S34.** Screen shot of Scattering Contrast Calculator for SWy-2 and wet CO<sub>2</sub> at a density of 0.800810 g/cm<sup>3</sup> (at the pressure of 836 psia) and a mass fraction of dissolved water of 0.0010490, which corresponds with Stage V. The formula for wet CO<sub>2</sub> was determined based on the mass fraction of dissolved water (which needed to be given in integer values), which is C998951O1997902D2098O1049.

**Substance editor and scattering contrast calculator**

Number of elements: 11      Density [g/cm3]: 2.3      ☐ Weight fraction?

**Modify element:** 1      2      3      4      5      6      7      8      9      10      11

Element: Ca      Isotope: natural      Electrons: 20      Neu b [e-14 m]: 0.49  
 Atom wt: 40.078      Incoh b [e-14 m]: 0.06  
 Abs Xsec [e-24 cm<sup>2</sup>]: 0.46

Change element: 12

Ca<sub>12</sub> Na<sub>32</sub> K<sub>5</sub> Al<sub>303</sub> Fe<sub>41</sub> Mn Mg<sub>54</sub> Ti<sub>2</sub> Si<sub>798</sub> O<sub>2400</sub> H<sub>400</sub>

|                                                      |             |
|------------------------------------------------------|-------------|
| Molecular weight                                     | 74554.4     |
| Weight of 1 mol [g]                                  | 1.23800e-19 |
| Num of mol in 1cm3                                   | 1.85783e+19 |
| Number of electrons per mol                          | 37181       |
| Number of el per 1cm3                                | 6.90759e+23 |
| Xray scat length dens (rho) [10 <sup>10</sup> cm-2]  | 19.46       |
| Xray SL per gram [10 <sup>10</sup> cm/g]             | 8.463       |
| Volume of 1 mol [cm3]                                | 5.38263e-20 |
| Total b of the molecule [cm]                         | 1.76507e-09 |
| Neut. scat length dens (rho) [10 <sup>10</sup> cm-2] | 3.279       |
| Neut. SLD (rho) per gram [10 <sup>10</sup> cm/g]     | 1.426       |
| X rays delta-rho squared [10 <sup>20</sup> cm-4]     | 378.3       |
| Neutrons delta-rho squared [10 <sup>20</sup> cm-4]   | 10.72       |
| Ratio Xrays/Neutrons delta rho-squared               | 35.28       |

**Saved substances:** ☐ Within this experiment (or on the computer)?

CO2 at 0 point 00185 g per c  
 CO2 at 0p81685gpercc  
 CO2 at 836 psi and 0.80152 g  
 CO2 at 836 psi and clay  
 CO2D2O at 0.0010638  
 CO2D2O at 800pt81 kgpermcube  
**CO2pure\_\_Opt0018526**  
 D2O\_atmPress  
 N2\_density\_0.001165

Second phase: CO2 at 0 point 00185 g per c      ☐ Use Vacuum?

X ray scatt length dens second phase (rho) [10<sup>10</sup> cm-2]: 0.01572  
 Neutrons scatt length dens second phase (rho) [10<sup>10</sup> cm-2]: 0.004652

Anomalous calculator

Save data  
 Load data  
 Delete data  
 New compound  
 Load as second phase

**Figure S35.** Screen shot of Scattering Contrast Calculator for SWy-2 and wet CO<sub>2</sub> at a density of 0.0018531 g/cm<sup>3</sup> (at the pressure of 14.7 psia) and a mass fraction of dissolved water of 0.00849210, which corresponds with Stage VI. The formula for wet CO<sub>2</sub> was determined based on the mass fraction of dissolved water (which needed to be given in integer values), which is C9915079O19830158D169842O84921.

## References

- Ilvasky, J., 2017, Irena SAS modeling macros manual, version 2.62 (for Igor 6.37 and Igor 7).
- Oskouei, R.H., Ibrahim, R.N, 2011, Restoring the tensile properties of PVD-TiN coated Al 7075-T6 using a post heat treatment. *Surface & Coatings Technology* 205, 3967-3973.
- Pruess, K., 2005, ECO2N: A TOUGH2 fluid property module for mixtures of Water, NaCl, and CO<sub>2</sub>, LBNL-57952, Lawrence Berkeley National Laboratory, 76 p.
- Pruess, K. ECO2N: A TOUGH2 fluid property module for mixtures of water, NaCl, and CO<sub>2</sub>; LBNL-57952; Lawrence Berkeley National Laboratory: Berkeley, CA, 2005; p 66.
